1 Research Article

2

3 Running Head: Impact of ULV spraying on *Aedes aegypti*.

4

5 Corresponding Author:

6 Amy C. Morrison, Ph.D.

7 Scientific Coordinator

8 NAMRU-6 Iquitos Laboratory

9 Clinica Naval

10 Ave. La Marina c/Calle Trujillo

11 Punchana, Peru

12 Phone: 51-65-601470 x107

13 Fax: 51-65-601472

14 Department of Entomology

15 University of California

16 Davis, CA 95616

17 Phone: 530-752-0565

18 Fax : 530-752-1537

19 Email: amy.aegypti@gmail.com

20

21

22

23 **Efficacy of *Aedes aegypti* control by indoor Ultra Low Volume (ULV) insecticide spraying**  
24 **in Iquitos, Peru**

25

26

27

28 Christian Gunning<sup>1</sup>, Kenichi Okamoto<sup>1</sup>, Helvio Astete<sup>2</sup>, Gissella M. Vasquez<sup>2</sup>, Erik Erhardt<sup>3</sup>,

29 Clara Del Aguila<sup>4</sup>, Raul Pinedo<sup>4</sup>, Roldan Cardenas<sup>4</sup>, Carlos Pacheco<sup>4</sup>, Enrique Chalco<sup>4</sup>, Hugo

30 Rodriguez-Ferruci<sup>5</sup>, Thomas W. Scott<sup>6</sup>, Alun L. Lloyd<sup>7</sup>, Fred Gould<sup>1</sup> and Amy C. Morrison<sup>2,6</sup>

31

32 <sup>1</sup>Department of Entomology, North Carolina State University, Raleigh, North Carolina, USA.

33 <sup>2</sup>Naval Medical Research Unit No. 6, 3230 Lima Pl., Washington DC 20521-3230, Lima and

34 Iquitos, Peru. <sup>3</sup>Department of Mathematics and Statistics, University of New Mexico,

35 Albuquerque, NM, USA. <sup>4</sup>Department of Environmental Sanitation, Peruvian Ministry of Health,

36 Iquitos, Peru <sup>5</sup>Loreto Regional Health Directorate, Iquitos, Peru. <sup>6</sup>Department of Entomology and

37 Nematology, University of California, Davis. One Shields Ave., Davis, CA 95616, USA.

38 <sup>7</sup>Biomathematics Graduate Program and Department of Mathematics, North Carolina State

39 University, Raleigh, North Carolina, USA.

40

41

42

43

44 **ABSTRACT 285 words**

45 **Background**

46 *Aedes aegypti* is a primary vector of dengue, chikungunya, Zika, and urban yellow fever viruses.  
47 Indoor, ultra low volume (ULV) space spraying with pyrethroid insecticides is the main  
48 approach used for *Ae. aegypti* emergency control in many countries. Given the widespread use of  
49 this method, the lack of large-scale experiments or detailed evaluations of municipal spray  
50 programs is problematic.

51 **Methodology/Principal Findings**

52 Two experimental evaluations of non-residual, indoor ULV pyrethroid spraying were conducted  
53 in Iquitos, Peru. In each, a central sprayed sector was surrounded by an unsprayed buffer sector.  
54 In 2013, spray and buffer sectors included 398 and 765 houses, respectively. Spraying reduced  
55 the mean number of adults captured per house by ~83 percent relative to the pre-spray baseline  
56 survey. In the 2014 experiment, sprayed and buffer sectors included 1,117 and 1,049 houses,  
57 respectively. Here, the sprayed sector's number of adults per house was reduced ~64 percent  
58 relative to baseline. Parity surveys in the sprayed sector during the 2014 spray period indicated  
59 an increase in the proportion of very young females. We also evaluated impacts of a 2014  
60 citywide spray program by the local Ministry of Health, which reduced adult populations by ~60  
61 percent. In all cases, adult densities returned to near-baseline levels within one month.

62 **Conclusions/Significance**

63 Our results demonstrate that densities of adult *Ae. aegypti* can be reduced by experimental and  
64 municipal spraying programs. The finding that adult densities return to approximately pre-spray  
65 densities in less than a month is similar to results from previous, smaller scale experiments. Our  
66 results demonstrate that ULV spraying is best viewed as having a short-term entomological  
67 effect. The epidemiological impact of ULV spraying will need evaluation in future trials that  
68 measure capacity of insecticide spraying to reduce disease transmission.

69  
70

71 **AUTHOR SUMMARY—196 words**

72 *Aedes aegypti* is a primary vector for medically important viruses that typically resides within  
73 houses. Indoor, ultra low volume (ULV) adulticide space spraying is considered to be more  
74 effective in controlling *Ae. aegypti* populations than outdoor spraying, and is widely used in  
75 tropical cities. Given the widespread use of indoor ULV spraying in emergencies by municipal  
76 control programs, the lack of large spatial scale evaluations is problematic. We conducted two  
77 large-scale experiments to evaluate indoor ULV pyrethroid spraying in the city of Iquitos, Peru  
78 in 2013 and 2014, and we also evaluated a municipal spraying effort. Our results demonstrate  
79 that densities of adults can be reduced by ULV spraying, but that adult densities in sprayed areas  
80 return to approximately pre-spray densities in less than a month. These findings agree with  
81 results from previous, smaller scale experiments, and confirm that ULV spraying should be  
82 viewed as having a short-term impact on *Ae. aegypti* populations. We provide extensive detail  
83 regarding our experimental design and data collection so that our results can assist in establishing  
84 best practices for future assessments of ULV spraying efforts, as well as aid in testing predictions  
85 of mathematical models of *Ae. aegypti* population dynamics.

86  
87

88

## 89 INTRODUCTION

90 *Aedes aegypti* is a primary vector for dengue (DENV), chikungunya (CHIKV), Zika  
91 (ZIKV) and urban yellow fever viruses (YFV). Dengue has become the most important human  
92 arthropod-borne viral infection worldwide (Brady et al. 2012, Bhatt et al. 2013). Each of these  
93 pathogens can be associated with explosive epidemics, where high disease incidence and public  
94 fear combine to overwhelm health systems (Wilder-Smith et al. 2016). Such epidemics put  
95 intense pressure on public health departments to react with emergency vector control measures  
96 (Esu et al. 2010, Simmons et al. 2012).

97 *Ae. aegypti* adults are primarily diurnal and females take frequent blood meals,  
98 predominantly from humans (Scott et al 1997, 2000, Scott & Takken 2012). These behaviors  
99 can in part explain why *Ae. aegypti* has been associated with epidemic virus transmission even  
100 when its population densities are low (Kuno 1995). Because adults typically reside inside houses  
101 (Scott & Takken 2012) where food, mates, and oviposition substrates are readily available,  
102 indoor adulticide space spraying has been more effective than outdoor spraying for suppressing  
103 *Ae. aegypti* populations (Morrison et al. 2008, Reiter et al. 2014, Esu et al 2010).

104 When indoor space sprays are applied appropriately, in carefully controlled small-scale  
105 experiments, adult *Ae. aegypti* populations often decreased by >80%. Population densities  
106 typically recovered quickly, however, (Perich et al. 2000, 2001, 2003; Koenraadt et al. 2007;  
107 Bowman et al. 2016) due to emergence of nulliparous mosquitoes from larval aquatic habitats  
108 inside sprayed areas (Reiter 2014), through migration from locations outside of sprayed areas  
109 (Koenraadt et al. 2007), or from females in sprayed houses that survived. In a systematic  
110 literature review, Esu et al. (2010) found only six studies from 1970's to 2010 that tested ultra-  
111 low volume (ULV) indoor space spraying under natural field conditions that met minimum

112 standards for evaluating mosquito population suppression. None of the studies evaluated the  
113 impact of these methods on human infection or disease (Esu et al. 2010). Results ranged from  
114 immediate reduction in biting by 99% and adult population reduction lasting six months (Pant et  
115 al. 1974), to a more common, modest control lasting 1-5 weeks (Perich et al. 2001; Koenraad et  
116 al. 2007, Castro et al. 2007). Most studies were small scale, with each treatment typically  
117 including one replicate of less than 50 houses. A more recent review of vector control  
118 effectiveness for dengue (Bowman et al. 2016) concluded that “although space spraying is the  
119 standard public health response to a dengue outbreak worldwide, and is recommended by WHO  
120 (2011) for this purpose, there is scant evidence available from studies to evaluate this method  
121 sufficiently.” In fact, Bowman et al. [26] (2016) could find no well-designed trial that assessed  
122 the impact of non-residual space spraying on human dengue infection or disease.

123 *Ae. aegypti* populations in the Amazonian city of Iquitos, Peru have been studied  
124 extensively since 1998. The spatial distribution of the species is highly clustered and does not  
125 have a consistent spatial or temporal structure (Getis et al. 2003, LeCon et al. 2014). Adult and  
126 immature population indices are highly variable and subject to sampling error (Morrison et al.  
127 2004a). Evaluation of control measures for this species, therefore, requires large sample sizes  
128 and exhaustive sampling.

129 In addition to studying the mosquito itself, the Iquitos research program monitored  
130 dengue transmission through passive clinic-based febrile surveillance in health care facilities  
131 throughout the city (Forshey et al. 2010) and a series of prospective cohort studies in targeted  
132 city neighborhoods (Morrison et al 2010, Rocha et al 2009, Stoddard et al 2013). The  
133 combination of longitudinal entomological and epidemiological studies created a database that  
134 could be used to examine, in real time, the impact of Ministry of Health (MoH) vector

135 interventions on *Ae. aegypti* populations and human disease. During their interventions, the MoH  
136 sprayed non-residual insecticide inside homes three times over an approximately 3-week period  
137 (Stoddard et al. 2014). Over a 10-year period, this kind of citywide municipal vector control  
138 program was associated with significant decreases in *Ae. aegypti* adult populations (Morrison et  
139 al. 2003, 2005) and when interventions were applied during the first half of the dengue  
140 transmission season, fewer dengue cases were detected and the transmission season was shorter  
141 (Stoddard et al. 2014). While the qualitative results from that analysis of dengue are consistent  
142 with an expectation of a positive public health impact of intra-domicile ULV insecticide  
143 application on dengue incidence, more statistically robust epidemiological studies are needed  
144 (Reiner et al. 2016).

145       Prevention of *Aedes*-transmitted viral disease will require integrated approaches; i.e.,  
146 combinations of existing and/or novel vector control strategies as well as vaccination.  
147 Mathematical models provide a way to compare diverse strategies and identify the most  
148 promising approaches. For example, data on *Ae. aegypti* populations in Iquitos were used to  
149 develop a biologically detailed, spatially explicit, stochastic model that tracked *Ae. aegypti*  
150 dynamics and genetics in an 18-ha area of the city (Legros et al. 2011, Magori et al. 2009).  
151 Preliminary validation of the model using Iquitos data was carried out (Legros et al. 2011), but  
152 evaluation of its capacity to accurately predict the entomological outcome of a vector control  
153 perturbation had not been tested. The experiments described here were primarily designed to  
154 generate data that could be used to test the ability of the entomological model to predict impacts  
155 of suppression measures.

156       In this study, we carried out a large-scale evaluation of the entomological impact of a  
157 widely used emergency vector intervention of *Aedes*-transmitted viruses in a well-characterized

158 study site. Our specific goal was to evaluate the impact of 6 cycles of indoor ULV pyrethroid  
159 spray applications (hereafter referred to as “spray applications”) on reductions of *Ae. aegypti*  
160 populations. Our experiments spanned periods of relatively low and high *Ae. aegypti* density in  
161 Iquitos, and compared the ULV application in experimental and public health settings. Our  
162 results constitute an important data set for development and validation of *Ae. aegypti* population  
163 dynamics models, and provide a detailed account of indoor space spray effects on *Ae. aegypti*  
164 populations.

## 165 166 **METHODS AND MATERIALS**

167  
168 **Study Area.** Our studies were conducted in two neighborhoods in the Maynas district of  
169 Iquitos (Fig. 1, Maps). Iquitos has a human population of ~380,000 (73.2°W longitude, 3.7°S  
170 latitude, 120 m above sea level). Located in the Amazon Basin of northeastern Peru, Iquitos is  
171 the largest urban center in the Department of Loreto, and has an average daily temperature of  
172 25°C and an average annual precipitation of 2.7 meters. Dynamics of *Ae. aegypti* populations in  
173 Iquitos are described in detail in earlier publications (Getis et al. 2003; Morrison et al. 2004a,b,  
174 2006, 2010; LeCon et al. 2014; Stoddard et al. 2013; Schneider et al. 2004, Hayes et al 1996;  
175 Watts et al. 199; Paz-Soldan 2011)

176 Both experimental study neighborhoods were characterized by city blocks of row houses  
177 (dwellings that share walls). Most houses occupied lots that were narrow (3-10 m wide), but  
178 relatively deep (20-60 m long). The majority of houses served as family residences, often  
179 containing extended or multiple families. Some houses were used for small businesses or offices,  
180 and others were unoccupied. There were a small number of vacant lots containing no structures  
181 (<1%). Many study houses were mixed-purpose, sharing living areas with a small store  
182 (“bodega”), office, shop (e.g. carpentry or vehicle repair), or restaurant.

183 Vector control activities were ongoing in Iquitos. The MoH carried out regular  
184 entomological surveillance and larviciding activities with temephos (®Abate) at ~3 month  
185 intervals. Since 2002, with few exceptions, MoH carried out 1-3 emergency indoor pyrethroid  
186 spray campaigns per year in response to dengue outbreaks, with variable success (Stoddard et al.  
187 2014). Our study was completed in 2014, and resistance bioassay profiles prior to January 2015  
188 indicated *Ae. aegypti* populations in the city were susceptible to pyrethroids (Palomino-Salcedo  
189 2014).

190 Figure 2 (Flow Chart) summarizes the design of our two separate experiments. The first  
191 and smaller of the two experiments (S-2013) ran for 16 calendar weeks and included an  
192 experimental buffer sector that was not sprayed, surrounding a central experimental sector that  
193 was sprayed. The buffer sector contained 765 houses and the spray sector had 398 houses (Fig.  
194 1A, Table 1). The S-2013 study area was located on the western border of the city, proximal to  
195 Lake Moronacocha (Fig. 1C).

196 The larger second experiment (L-2014) ran for 44 calendar weeks, and included 1,051  
197 houses in the surrounding buffer sector and 1,110 houses in the central spray sector (Fig. 1B,  
198 Table 1). L-2014 was carried out in a neighborhood several kilometers to the north of S-2013,  
199 centrally located in Iquitos, and bordered on the south by an abandoned airstrip (Fig. 1C). The L-  
200 2014 study area was selected because the *Ae. aegypti*-free airstrip provided a physical barrier to  
201 *Ae. aegypti* dispersal on one of its four sides. This experimental structure of L-2014 was selected  
202 to test our mathematical model's ability to capture any spatial features of the recovering  
203 mosquito population.

204 **Entomological Surveys.** To monitor population densities and age structure of *Ae.*  
205 *aegypti* populations, we carried out standardized adult mosquito collections using Prokopack

206 aspirators (Vazquez-Prokopec et al. 2009) (henceforth adult surveys) and standardized  
207 larval/pupal demographic surveys [47-49] (Focks et al. 1993, 1997, 2000) (henceforth immature  
208 surveys), except when noted. Survey protocols are described in detail in previous publications  
209 [6] (Getis et al. 2003; Morrison et al. 2004a; LaCon et al. 2014; Schneider et al. 2004, Vazquez-  
210 Prokopec et al. 2009).

211 Collected adults were immediately transported to a field laboratory in Iquitos for  
212 processing as described in Morrison et al. (Morrison et al. 2004b). Adult mosquitoes were  
213 sedated by cold (4°C), identified, counted, and females separated. In most cases, we scored  
214 female *Ae. aegypti* as unfed, blood fed (full, half full, or trace amounts), or gravid. Females were  
215 also scored for parity (Scott et al. 2000).

216 **Pyrethroid spray applications.** Experimental insecticide spraying was done by MoH  
217 employees, between 17:00-20:00 to avoid high temperatures and varying winds. Each spray team  
218 was comprised of 3 individuals: 2 MoH sprayers and 1 monitor from the research team. Each  
219 week, on the initial day of a spray cycle (usually Mondays), spraying was attempted in all houses  
220 in the spray sector. To improve spray coverage within each cycle, on subsequent days spray  
221 teams revisited houses that were not sprayed on the initial day of the spray cycle (a minimum of  
222 2 and up to 10 visits, as needed) to conduct spraying. Pyrethroid insecticides were applied using  
223 Solo or Stihl backpack sprayers with settings adjusted for ULV application, or Colt hand-held  
224 ULV sprayers. Residents were instructed not to return to their houses for a minimum of 1 hour.  
225 See Text S1 for more details.

226 **Quality Control for Spray Applications.** As a quality control measure, for each spray  
227 cycle, 3 to 7 houses were selected to monitor efficacy of the insecticide spray. Operators did not  
228 know which houses would be selected for monitoring. For each monitored house, just after the



229 spray operator had finished the application, a single screen cage containing adult mosquitoes was  
230 placed in each of the following locations: bedroom, living room, kitchen, and yard, based on  
231 standard WHO protocols (WHO 2005, Reiter & Nathan 2003). Each cage contained 25 adult *Ae.*  
232 *aegypti* of age 24-36 hours from a pathogen-free laboratory colony (Reiter et al. 2003, WHO  
233 guidelines). A separate laboratory colony was initiated for each experiment from mosquitoes  
234 collected from houses in Iquitos and held for 1-2 generations prior to use. One hour after  
235 spraying, all cages were retrieved and evaluated for knockdown (no movement), stored in a  
236 styrofoam cooler with moist paper towels for 24 hours, and then examined for mortality. When  
237 mortality was < 80%, equipment was recalibrated to ensure proper spray function on subsequent  
238 days.

239 *Droplet size.* Teflon treated slides were placed in 2 randomly selected houses during each  
240 spray cycle and retrieved 1 hour post-spray. Droplet size was measured using a micrometer in  
241 Motic Images Plus 2.2. Droplets were counted and measured in a 1 cm<sup>2</sup> square.

242 **Experimental Design.** Experimental study sectors are depicted in Figures 1A & B. The  
243 temporal sampling units are referred to as “circuits” because they were time periods when we  
244 completed full survey routes through all of the blocks of houses in the spray and buffer sectors  
245 (see Fig. 2 for a flow chart of experimental design, and Fig. S7 for survey maps). During each  
246 circuit, we attempted to visit and survey 100% of the houses in the entire study area at least once  
247 (with one exception, L-2014 C2). The percentage of total houses successfully surveyed and/or  
248 sprayed in each circuit ranged from 67-90%, due to closed or unoccupied houses, or residents  
249 who chose not to participate in the study (see Fig. 3B, Table S1).

250 Each circuit was divided into subcircuits that lasted approximately one week, but never  
251 more than 10 days. In general, subcircuit surveying was conducted systematically by block,

252 where surveyors attempting to visit every 4<sup>th</sup> house (25% of the circuit) each week (see Text S2  
253 for exceptions).

254 Both experiments consisted of 6 weekly cycles of ULV indoor spray applications (see  
255 above). Immature and adult surveys were carried out before (pre-intervention) and after (post-  
256 intervention) the spraying periods. During the experimental spray periods only adult surveys  
257 were carried out.

258 In the baseline pre-intervention circuit of each experiment (C1), study teams surveyed a  
259 single block together, proceeding as a group to an adjacent block until all houses in the study  
260 area were visited at least once. Houses that were not accessible on a day of a visit were revisited  
261 the next day and surveyed if open. After all study blocks were surveyed, houses that remained  
262 unsurveyed were visited a final time, and surveyed if possible. In subsequent circuits, similar  
263 spatially systematic surveying within subcircuits was carried out, and unsurveyed houses were  
264 visited a minimum of 3 times per circuit, or until access was obtained or refused.

265 **Experiment 1 (S-2013).** The initial S-2013 baseline pre-intervention circuit (C1) was  
266 carried out from 22-29 April 2013 in the spray sector, and from 29 April-16 May 2013 in the  
267 buffer sector (C1, Table 1, Fig. 3A). During the experimental treatment circuit (C2),  
268 Alphacypermetrin 10% (<sup>TM</sup>Turbine 10%) was applied once per week for 6 consecutive weeks  
269 using Solo backpack sprayers (Cycles 1-6) or Colt hand-held sprayers (Cycles 4-6). Adult  
270 surveys were typically carried out during the spray period on Monday afternoons just prior to the  
271 initiation of each spray cycle, as described above. This design, therefore, measured adult  
272 densities up to 7-days after a previous spraying event. Post-intervention surveys (C3-C4) were  
273 initiated 10 days after completion of the last spray cycle (see Fig. S7A and S8A for detailed  
274 maps of surveys and sprays, respectively).

275           **Experiment 2 (L-2014).** Following the initial L-2014 baseline, pre-intervention circuit  
276 (C1), the experiment was interrupted by a MoH citywide emergency intervention in response to a  
277 dengue outbreak (see also Text S1). The MoH intervention consisted of 3 cycles of indoor  
278 cypermethrin 20% (@SERPA ciper 20 EW) spray applied between 04:00-09:00 or 17:00-20:00  
279 with Solo backpack sprayers. MoH personnel generally sent an advance team with loudspeakers  
280 announcing the arrival of the spray teams, who visited each house on a block a single time. The  
281 MoH personnel had no mechanism to spray houses missed on their initial visit. In contrast to S-  
282 2013, during the L-2014 baseline circuit (C1) study teams worked in two groups (4 two-person  
283 teams). To survey both sectors simultaneously, one group was assigned to the spray sector, while  
284 the other was assigned to the buffer sector.

285           In response to information from the MoH about their imminent emergency spraying  
286 program (above), we adapted our study design in 3 ways (see also Text S2). First, we  
287 coordinated with the MoH to conduct adult surveys on a subset of L-2014 houses prior to (~20%  
288 of houses, C2) and during the emergency spray period (~20% of houses in each spray cycle, C3).  
289 No immature surveys were conducted during these circuits (for details see Fig. 3A, Fig. S7B, and  
290 Table S1). Second, we conducted independent monitoring of the 3 emergency citywide spray  
291 cycles (C3), along with standard quality control spraying procedures. We added a circuit of four  
292 spatially systematic subcircuits of full surveys (immature and adults, C4) during the MoH post-  
293 intervention period. Third, we added an extra circuit of adult surveys (~25% of houses, C5) that  
294 preceded experimental intervention. After Circuit 5, we resumed our planned L-2014  
295 experiment (See Fig. S7B for a detailed map of survey locations).

296           As in S-2013, we applied 6 weekly cycles of ULV spraying (C6). A different pyrethroid  
297 insecticide, cypermethrin 20% (ESTOQUE® 20 E.C., Tecnologia Quimica y Comercio S.A.)

298 was used. For each cycle, spraying began on Monday evening using Solo backpack sprayers. We  
299 attempted to spray all accessible houses. Follow-up spraying of houses missed during the first  
300 day was carried out Tuesday-Friday between 07:00 and 20:00 using Colt hand-held sprayers (see  
301 also Text S2). In L-2014, adult surveys were typically carried out one day after a house was  
302 sprayed.

303 **Data Analysis.** Unless otherwise noted, we analyzed only *Ae. aegypti* data, and used houses  
304 as the basic spatial units of observation. During experimental spray periods, we assigned a "spray  
305 status" indicator variable to each adult survey. "Prior spray" indicated that a spray application  
306 occurred in that house (prior to the survey) during the current or previous calendar week  
307 (otherwise, "no prior spray"). During L-2014, the relative timing between spray and survey was  
308 unclear for a limited number of surveys, which were designated as "timing unclear" (Tables S4  
309 and S5).

310 **Statistical Models.** For each experiment, a suite of statistical models was developed to  
311 estimate the impact of spray treatment on mosquito densities, proportion of infested houses, and  
312 population age structure (as determined from parity examination). With one exception, all  
313 comparisons and significance tests were conducted within-experiment.

314 We used two generalized linear model (GLM) specifications, both of which used a log link.  
315 For all counts, we used a negative binomial GLM (NB-GLM). Here, the response was the count  
316 of mosquitoes per house, and was assumed to follow a negative binomial distribution. The NB-  
317 GLM estimates the log of mean counts, and is akin to Poisson regression, while allowing for  
318 response over-dispersion (separate mean and variance) (Zeileis et al. 2008). For all proportions,  
319 we used a logistic GLM (L-GLM, i.e., logistic regression). Here, the response was the  
320 proportion of successes (out of total number of events), and was assumed to follow a binomial

321 distribution. The choice of “success” was an arbitrary label applied to one of two mutually  
322 exclusive possibilities (presence or absence). The L-GLM estimates the log probability of  
323 success. For ease of interpretation, all model results were un-transformed after analysis and  
324 displayed in the original (unlogged) scale of observations.

325 To identify structural, pre-perturbation differences between sectors, we used an NB-GLM  
326 that estimated the number of *Ae. aegypti* adults per house (AA/HSE) in the baseline circuit (C1)  
327 in response to physical characteristics of houses, including building, floor, and roof construction,  
328 as well as number of containers, rooms, and surveyed rooms.

329 To assess the effect of spraying, we used an NB-GLM that estimated AA/HSE in response to  
330 circuit and spray sector. In addition, we used a companion L-GLM that predicted Adult House  
331 Index (AHI: proportion of houses with 1 or more *Ae. aegypti* adults) in response to circuit and  
332 spray sector. Finally, we tested the NB-GLM model formulation with alternate responses:  
333 female *Ae. aegypti* adults per house, and non-*Aedes* adults per house.

334 A NB-GLM was also used to estimate the effect of study year and spray status on AA/HSE.  
335 This model included only surveys conducted in the spray sector during experimental spray  
336 periods.

337 Counts from immature surveys and parity surveys were converted to proportions: container  
338 surveys yielded per-house proportion of positive containers (henceforth called the PrPC), which  
339 is also referred to as the container index. Parity surveys yielded the per-house proportion of  
340 nulliparous females (henceforth called the PrNF). Each proportional measure (PrPC, PrNF, and  
341 PrIH) was analyzed using a pair of L-GLM, weighted by the number of observations, with a  
342 separate model for each study year. Predictors included circuit and sector. The response was the  
343 log proportion of “successful” events per house, i.e., detection of positive containers or

344 nulliparous females. The container model estimated the log proportion positive containers per  
345 house,  $\log(\text{PrPC})$ , and the reproductive status model estimated log proportion nulliparous  
346 females per house,  $\log(\text{PrNF})$ . We also model the total number of *Ae. aegypti* positive containers  
347 per house (PC/HSE) using an NB-GLM. Note that Breteau Index (BI) =  $100 * (\text{PC}/\text{HSE})$ .

348 To further evaluate the effect of spraying on mosquito densities, we employed contrast  
349 analysis (Lenth 2016) on the sector-by-circuit NB-GLM. We contrasted between circuits (spray  
350 sector only), and between sectors. The between-circuit contrast was complicated by temporal  
351 variation, either in extrinsic environmental factors, such as weather, or in intrinsic ecological  
352 processes, such as demographic stochasticity. The between-sector contrast was complicated by  
353 potential spatial ecological differences between sectors. More robust conclusions can be made if  
354 both types of contrasts provide similar assessments of the effect of spraying.

355 For the statistical models of adult, immature, and parity surveys, statistically  
356 indistinguishable groups and 95% confidence intervals (CI) of experimental group effects were  
357 estimated using least-squares means, also known as predicted marginal means, via the *lsmeans* R  
358 package (Lenth 2016). Tukey's method was used to control the family-wise error rate (Lenth  
359 2016).

360 **Human Use Statement:** The study protocol was approved by the Naval Medical  
361 Research Unit Six (Protocol #NAMRU6.2013.0001) Institutional Review Board, which included  
362 Peruvian representation, in compliance with all US Federal and Peruvian regulations governing  
363 the protection of human subjects. IRB authorization agreements were established between the  
364 Naval Medical Research Unit Six and the University of California at Davis and North Carolina  
365 State University. The protocol was reviewed and approved by the Loreto Regional Health  
366 Department, which oversees health research in Iquitos. In all instances consent from adult

367 members of houses was obtained without written consent. Written information sheets were  
368 provided to study participants, providing a detailed overview of the experiment design,  
369 procedures, and study goals before initial pre-interventions surveys. Permission to enter houses  
370 was provided at each survey or spray application visit.

371

## 372 **RESULTS**

### 373 *Overview*

374 In the six weekly ULV spray cycles of S-2013, 1,860 spray applications were carried out in  
375 398 houses. During L-2014, 4,986 spray applications were carried out in 1,110 houses. A total  
376 of 3,843 surveys over 16 weeks and 12,124 surveys over 44 weeks were carried out in S-2013  
377 and L-2014, respectively (Fig. 3A, Table 1). Adult *Ae. aegypti* densities were highly variable  
378 over space (Fig. S1) and time (Fig. S4) with highly skewed distributions. No adult mosquitoes  
379 were collected from most houses, and large numbers of adults were captured in very few houses  
380 (Fig. S1).

381 Model contrasts (AA/HSE) are shown in Fig. 5; details of adult densities and house indices  
382 are shown in Tables S6-S7. Overall, adult densities in the S-2013 baseline circuit (early May,  
383 C1) were 0.26 and 0.40 *Ae. aegypti* per house (AA/HSE) in the buffer and spray sectors  
384 respectively. During this same baseline circuit, 15% and 16% of houses contained one or more  
385 *Ae. aegypti* adults (AHI) in the buffer and spray sectors, respectively (Tables S7A-B). The L-  
386 2014 baseline circuit (January, C1) showed that *Ae. aegypti* adult densities were higher than in S-  
387 2013: 0.62 and 0.77 AA/HSE in the buffer and spray sectors, respectively. A later pre-  
388 intervention circuit in April (C5, prior to experimental spraying) yielded 0.44 and 0.67 AA/HSE  
389 in the buffer and spray sectors, respectively. The corresponding AHIs for these surveys were

390 31% and 34% in the spray and buffer sectors, respectively for January, C1, and 22% and 28% for  
391 April, C5.

392 Adult *Ae. aegypti* densities and house indices within the spray sector during spray periods  
393 were also lower during S-2013 (0.07 AA/HSE; AHI 5.5%) compared to L-2014 (emergency  
394 spraying, C3: 0.30 AA/HSE; AHI 18%; experimental spraying, C6: 0.31 AA/HSE; AHI 11%).

395 In the S-2013 post-intervention circuits (C3-C4), *Ae. aegypti* adult densities in the spray  
396 sector achieved a maximum of 0.35 AA/HSE (AHI 23%). In L-2014 (C7-C9), *Ae. aegypti* adult  
397 densities in the spray sector reached a maximum of 1.31 AA/HSE (AHI 41%).

398

#### 399 *Meteorological conditions*

400 Meteorological conditions were consistent between the two experiments, with average  
401 temperatures of 25.5°C (average minimum = 22.0°C, average maximum=32.0°C) and 25.6°C  
402 (average minimum = 22.0°C, average maximum=31.9°C) during the S-2013 and L-2014  
403 experiments, respectively (National Climatic Data Center, <https://www.ncdc.noaa.gov/cdo->  
404 [web/](https://www.ncdc.noaa.gov/cdo-web/)). Precipitation during both years was approximately 0.84 cm per day. During the L-2014  
405 entomological surveys for the MoH emergency citywide spray operation (January- March 2014),  
406 the temperatures were higher (average 25.9°C, average minimum = 23.3°C, average  
407 maximum=32.6°C) and it was rainier (average 1.09 cm per day) than at other times during the S-  
408 2013 and L-2014 experiments.

409

#### 410 *Baseline Surveys*

411 Comparisons of spray and buffer sectors in both experiments indicated that the two  
412 sectors had similar housing characteristics. No household physical characteristic was a predictor



413 of adult mosquito density (data not shown). Consequently, we did not include such  
414 characteristics in our statistical models. Overall, for both years baseline numbers of *Ae. aegypti*  
415 adults were comparable between spray and buffer sectors (Table S2). During S-2013, however,  
416 we found a marginally significant difference between the buffer and spray sectors during the  
417 baseline (C1) circuit (0.26 vs 0.40 AA/HSE, resp.; Fig. 5, Table S2,  $p=0.039$ ), making some  
418 statistical analyses of spray impacts conservative. During L-2014, baseline densities (C1) were  
419 not significantly different between the buffer sector (0.62 AA/HSE, AHI=31.1%) and spray  
420 sector (0.77 AA/HSE, AHI=33.7%) (Fig 5, Table S2,  $p=0.09$ ). We observed no statistically  
421 significant baseline differences in adult female age structure between buffer and spray sectors  
422 (PrNF, Tables S8A and S8B). Baseline immature indices were similarly not different; for  
423 example, Breteau Indices ( $BI = 100 * PC/HSE$ ) ranged from 9.4-10 in the buffer and spray  
424 sectors in both experiments (Table S9A and S9B). Container indices (i.e., percentage of water-  
425 holding containers infested with larvae or pupae,  $100*PrPC$ ) ranged from 3.9-4.1 in S-2013 and  
426 3.1-3.3 in L-2014 (Tables S10A and S10B).

427

#### 428 *Spray Coverage*

429 The average percent of houses sprayed was lowest during the 3 MoH citywide emergency  
430 spray cycles in L-2014 ranging from 71% during cycle 1 to 62% in cycle 3 (Fig 3B). For S-  
431 2013, coverage started at 77% in cycle 1, decreased to 73% in cycle 3, and then improving in  
432 each subsequent cycle to 90% (cycle 6). For L-2014, coverage started at 74% in cycle 1, then  
433 modestly increased over time to approximately 82% in cycle 6 (Fig. 3B).

434 In both experiments, most spray sector houses were sprayed in more than 3 out of 6 spray  
435 cycles, and more than half of the houses were sprayed in all 6 spray cycles (Fig. S2). The

436 primary reasons for not spraying a house were: house closed when personnel visited (3-16% for  
437 S-2013 spray, 19-28% for L-2014 MoH emergency spray, 7-16% for L-2014 spray), or residents  
438 did not allow access to the house (6-14% for S-2013 spray, 9-11% for emergency spray, 8-11%  
439 for L-2014 spray). During the S-2013 experiment, but not in L-2014, we recorded the reasons  
440 given by residents for refusing access. In many cases, teams were allowed access on subsequent  
441 visits. In early cycles, about one-third of the refusals cited a direct objection to fumigation,  
442 saying they did not believe it was effective or that the teams were not really using insecticide. In  
443 other cases, the reason given was inconvenience to the residents: eating, bathing, working,  
444 selling food, or that a sick person or newborn was in the house and could not leave. In some  
445 instances the homeowner was not present so consent could not be given.

446

#### 447 *Spray Efficacy*

448 During S-2013, 24-hour mortality of caged sentinel mosquitoes ranged from 87-97% with  
449 some variation across cycles (Fig. S3). Mean mortality was lower in L-2014, ranging from 53-  
450 87%. Overall, we observed a significant decrease in spray efficacy in L-2014 relative to S-2013  
451 (Table 2). During S-2013, Colt hand-held ULV sprayers were used on 1/3<sup>rd</sup> of the blocks during  
452 spray cycles 4-6. We observed higher mortality and knockdown in cycles 4-6, and less variation  
453 than was observed in cycles 1-3, which only included backpack sprayers.

454 Droplet size (mean±SD) varied between experiments and sprayer type. Colt sprayers had  
455 smaller and more consistent droplets (19.1±12.6 µm) than backpack sprayers (29.2±19.5 µm).  
456 During the L-2014 MoH emergency spray, backpack sprayers were not properly calibrated, with  
457 an average droplet size of 39.8±25.8 µm. This improved to 20.6±14.1 µm in subsequent cycles.

458 During the L-2014 6-cycle experiment, droplet size averaged  $18.1 \pm 14.7 \mu\text{m}$  and  $23.6 \pm 13.2 \mu\text{m}$   
459 for Colt and backpack sprayers, respectively.

460

#### 461 *Experiment 1 (S-2013)*

462 Surveys conducted during the 6-week spray period (C2) generally occurred about one  
463 week after spraying. During the spray period, ULV spraying reduced adult *Ae. aegypti*  
464 population densities rapidly and significantly from 0.40 to 0.07 AA/HSE after six cycles of  
465 spraying (Fig. 4), yielding an 82.5% reduction relative to baseline (Fig. 5, Table S3,  $p < 0.00001$ ).  
466 The buffer sector, in contrast, had 0.26 AA/HSE both before (C1) and during (C2) the spray  
467 period.

468 Adult densities in the sprayed sector were 73.1% lower than in the buffer sector during  
469 the spray period (C2, Fig 5, Table S2,  $p < 0.00001$ ). Ongoing surveys within the spray sector  
470 during the spray period ranged from 0.04-0.08 AA/HSE, and did not change significantly over  
471 the course of the six sprays (Fig 6). Spray sector AA/HSE remained 45% lower than baseline  
472 levels during the first post-intervention period (C3, Fig. 5, Table S3,  $p = 0.035$ ), but densities  
473 increased from 0.04 to 0.27 AA/HSE between the first and second week post-spray. During the  
474 second post-intervention period (C4), spray sector adult densities returned close to baseline  
475 densities, increasing from 0.22 to 0.35 AA/HSE (Table S6A) which was 89% of baseline (Fig. 5,  
476 Table S3,  $p = 0.94$ ) and 83.3% of the buffer sector density at that time (Fig. 5, Table S2,  $p = 0.36$ ).

477 Adult house indices in the spray sector, by comparison, decreased from 16% during  
478 baseline surveys to 5.5% during the spray period (C2), then increased to 12.7% and 17.3%  
479 during the first and second post-intervention periods, respectively (C3-C4, Table S7A). In the  
480 buffer zone, AHIs were 15% during both baseline and spray periods, then increased to 21% and

481 23% in the first and second post-intervention evaluations (Table S7A).

482 During the S-2013 spray period (C2), only a small number of females (9 total) were  
483 collected in the spray sector (Table S8A). Therefore, we did not attempt to compare the age  
484 structure of *Ae. aegypti* populations before and after spray applications for this experiment.  
485 Model estimates of the proportion of nulliparous females (PrNF) showed accordingly high  
486 uncertainty (Fig. S5B and Table S8A).

487 Results from pupal demographic surveys followed a pattern similar to that of adult house  
488 indices. Baseline BIs were 10.0 in both the buffer and control sectors (Table S9A). BIs were not  
489 measured during the spray period, but during the first post-intervention period (C3) BI decreased  
490 slightly in the spray sector to 7.4 and increased to 16.1 in the buffer sector. During the second  
491 post-intervention period (C4), BIs were 15.1 and 22.3 in the buffer and spray sector,  
492 respectively. The post-treatment spray sector had statistically significantly higher PrPC than any  
493 other sector or time period (Fig. S5B, Table S10A). In the C4 spray sector, PrPC reached  
494 approximately 0.11, significantly higher than seen in the baseline spray sector (0.04) or in the C4  
495 buffer sector (0.06).

496

497

498 *Experiment 2 (L-2014):*

499 *MoH Emergency Spray.* MoH ULV spray applications were carried out in both  
500 experimental sectors (spray, buffer) prior to initiation of L-2014 experimental studies. In the  
501 baseline circuit (C1), AA/HSE ranged from 0.62-0.77 (Table S6B), and AHI ranged from 31-  
502 34% (Table S7B). During the citywide emergency spray period, AA/HSE decreased to 0.37  
503 (AHI 16%) in the buffer sector and 0.30 AA/HSE (AHI 18%) in the spray sector, thus showing a

504 modest 40-50% reduction in adult densities relative to the baseline Circuit 1 (Fig. 5, Table S3,  
505  $p < 0.0001$ ). *Ae. aegypti* densities in the geographically central spray sector were more variable  
506 than for houses in the surrounding buffer sector. *Ae. aegypti* densities did show some recovery in  
507 the post-emergency circuit (C4), rising from 0.37 to 0.58 AA/HSE in the buffer sector and from  
508 0.30 to 0.53 AA/HSE in the spray sector. There was also a small trend toward an increase in the  
509 proportion of nulliparous females (PrNF) between baseline and the emergency spray period,  
510 from 0.03 to 0.10 and from 0.07 to 0.11 in the buffer and spray sectors, respectively (C1 to C3,  
511 Table S8B).

512 Immature indices, which were measured at baseline (C1) and the post-emergency survey  
513 (C4), were similar over time. For example, the spray sector BI (Table S9B) during baseline  
514 (10.0) was not statistically different than in post-intervention surveys (6.3-11.9). The proportion  
515 of positive containers (PrPc) ranged from 0.4-0.5 across the baseline and post-emergency circuits  
516 (C1 and C4, Table S10B).

517 *Experimental Spray.* For our experimental evaluation, we carried out a circuit of pre-  
518 intervention adult surveys during April (C5) before initiating 6 cycles of ULV spray applications.  
519 In both spray and buffer sectors, adult densities were consistent with the January baseline  
520 surveys (Fig. 5, Table S3  $p = 0.95$ ). During C5, however, there were significantly higher adult  
521 densities in the spray sector (0.67 AA/HSE) relative to the buffer sector (0.44 AA/HSE) (Fig. 5,  
522 Table S2,  $p = 0.0034$ ). During the experimental spray period (C6), AHI decreased significantly  
523 from 28 to 11% (0.67 to 0.31 AA/HSE) in the spray sector compared to the range of 22% and  
524 21% (0.44 to 0.46 AA/HSE) in the unsprayed buffer sector (Table S7B).

525 Adult densities rebounded quickly after cessation of spraying (C7, Fig. 4, Fig. 6, Table  
526 S6B). AA/HSE increased from 0.31 during the spray period (C6) to 0.51 post-spray (C7), which

527 was not statistically significantly different from the January baseline of 0.77 (C1) or from that of  
528 the April pre-intervention survey (C5, 0.67). During the L-2014 post-spray monitoring period  
529 (C7-C9), increases in adult densities were observed in the spray sector, with a 170% increase  
530 above January (C1) baseline levels in the final circuit (C9, Table S3). In the buffer sector, from  
531 C6 to C9, AHI ranged from a low of 21% during the spray period (C6) to a high of 27% (C7). In  
532 contrast, in the spray sector, AHI increased during each post-intervention survey, ranging from  
533 11% during the spray period (C6) to 41% during the final post-intervention period (C9) (Table  
534 7B). Adult densities during the first post-intervention circuit (C7) remained significantly lower  
535 than baseline (C1) levels (Fig. 5, Table S3,  $p=0.017$ ). In C8-C9, however, densities were  
536 significantly higher than baseline levels (Table S3,  $p\leq 0.01$ ). When comparing the buffer and  
537 spray sector, a similar pattern was observed. Adult densities during C7 remained significantly  
538 lower in the spray sector compared to the buffer sector. During C8 and C9, however, the spray  
539 sector had significantly more adult *Ae. aegypti* than the buffer sector (Fig. 5, Table S2).

540 Overall, we observed a strong effect of spraying on parity. During the spray period (C6),  
541 the proportion of youngest (nulliparous) females (PrNF) was significantly higher in the spray  
542 sector than in the buffer sector. Likewise, we observed an approximate doubling of PrNF in the  
543 spray sector relative to baseline (Table S8B).

544 Immature indices increased between the post-emergency spray survey (C4) and first post-  
545 experimental study survey (C7). For example, BI increased from 7.9 to 15.0 and from 8.3 to  
546 11.9 in the buffer and spray sectors, respectively (Table S9B). Between the first and second post  
547 intervention surveys (C7-C8), BI dropped to 5.9 and 6.3 in the buffer and spray sectors,  
548 respectively. Two months later (C9), the BI decreased to 4.4 in the buffer sector and increased to

549 7.6 in the spray sector. Similar patterns were seen for the proportion of containers with  
550 immatures (Table S10B).

551 **Comparison of sprayed and unsprayed houses.** During the S-2013 experiment,  
552 entomological surveys were carried out during the afternoon before each ULV spray cycle was  
553 initiated. For the majority of houses (254 of 398, 64%), therefore, *Ae. aegypti* densities were  
554 measured 7 days after the previous spraying. Only 2% of houses were sprayed fewer than 5 days  
555 earlier. In contrast, during the L-2014 experiment, entomological surveys were typically  
556 conducted the day after each spray cycle. This difference was the result of logistical concerns, as  
557 L-2014 involved many more houses. For 164 of the 1,259 house sprays (13%), the exact timing  
558 of each house spray was not available. In addition, some of the houses were sprayed later in the  
559 spray cycle (Table S5). The majority of L-2014 house surveys occurred within 2 days of  
560 spraying, and all houses were surveyed within 4 days of spraying. Thus, the average interval  
561 between house spray and survey was shorter than in S-2013. In the spray sector in both  
562 experiments, AA/HSE were lower in houses that had been sprayed the prior week compared to  
563 those that had not. In S-2013, AA/HSE was 0.06 and 0.11 in houses with prior spray and no  
564 prior spray, respectively, while L-2014 experienced 0.28 and 0.56 AA/HSE in houses with prior  
565 spray and no prior spray, respectively (Table S5). A (marginally) significant difference in  
566 AA/HSE between spray status groups was observed only during 2014 (Table S4,  $p=0.047$ ).

567

## 568 **DISCUSSION**

569

570 Despite the lack of a well-informed evidence base (Bowman et al. 2016), vector control  
571 of *Ae. aegypti* is often described as ineffective yet continues to be widely practiced by public  
572 health programs [6, 12, 26, 59, 60] (Simmons et al. 2012, Bowman et al. 2016, James et al. 2011,

573 Reiter 2014, Andersson 2015, Bowman et al. 2016). Increasing attention has been given to  
574 integrated vector management, community involvement, and sustainability (Wilder-Smith et al.  
575 2017). There is increasing recognition, however, that programs lacking interventions specifically  
576 directed at adult mosquitoes are insufficient for suppression of dengue and other *Aedes*-borne  
577 diseases [20, 22] (Morrison et al. 2008, Achee et al. 2015). A WHO dengue Scientific Working  
578 Group identified “analysis of the factors that contribute to the success or failures of national  
579 programs in the context of dengue surveillance and outbreak management”, including vector  
580 control as a priority topic for future research [61] (Runge-Ranzinger et al 2016).

581 Through two large-scale experimental studies and an assessment of a MoH emergency  
582 intervention campaign, our study evaluated an adulticiding strategy that is embedded in many  
583 national *Aedes*-transmitted virus control programs. We observed a clear *Ae. aegypti* population  
584 reduction during the extended period of repeated spray applications. These reductions were,  
585 however, not sustained after cessation of spraying.

586 Our study design could not logistically include randomized replicates [59, 63] (James et  
587 al. 2011, Reiner et al. 2016, Wilson et al. 2015) because we focused on monitoring spraying in  
588 large neighborhoods of houses. A review of previous *Ae. aegypti* space spray studies (Esu et al.  
589 2010) shows that each replicate included 50 or fewer houses so that movement of adults from  
590 surrounding houses could have impacted results. In contrast, we monitored spraying in large  
591 numbers of houses; more than 1,100 houses (up to 2,100 houses) during the two experimental  
592 interventions, and a MoH citywide emergency spray program. Our experimental design reduced  
593 the potential impact of adults moving into the sprayed sector from unsprayed locations. In the  
594 citywide spraying, all areas of the city were expected to have about the same decrease in *Ae.*



595 *aegypti* densities so adult movement should not have impacted the recovery at all. There is  
596 clearly a tradeoff between degree of replication possible and the size of experimental units.

597         In order to maintain study quality, our experimental interventions were supervised by  
598 trained entomologists. Our monitoring of the impacts of the L-2014 citywide emergency  
599 spraying provides a realistic and complimentary effectiveness assessment under practical, public  
600 health circumstances. It is also important to note that our study was primarily designed to  
601 provide data that could then be used to evaluate a computer simulation model (Magori et al)  
602 under extreme perturbation conditions, which was a major reason for evaluating a single  
603 centralized spray sector surrounded by a buffer sector.

604         The effectiveness of pyrethroid applications varied between years, but was similar  
605 between citywide emergency sprays and experimental sprays in 2014. Interestingly, in all  
606 experiments adult *Ae. aegypti* densities decreased significantly after the first cycle of spraying  
607 then fluctuated at relatively low levels during the remaining spray cycles; that is, additional  
608 cycles did not lower mosquito densities further. In all three interventions, adult populations  
609 partially recovered within 2 weeks of spray cessation. The pattern of rapid recovery of the *Ae.*  
610 *aegypti* population in our study is consistent with a number of previous reports (Esu et al. 2010)  
611 [5]. Studies by Perich et al. [23, 24] (2001, 2003) in Honduras and Costa Rica showed an  
612 approximately 90 percent reduction in adults one week after spraying, but the effect of the  
613 treatment was no longer significant after 6-7 weeks.

614         In the two experimental suppression trials we could not definitively determine if recovery  
615 of population densities was from adults migrating in from the surrounding buffer sector and/or  
616 from new adults emerging from development sites within the spray sector. However, in the  
617 emergency citywide spraying, the recovery was similar to that in the experimental trials. This

618 suggests that movement of adults was not the key factor. Mosquito densities after the L-2014  
619 experimental spray were monitored for a longer period of time: 23-weeks post-spray in L-2014  
620 versus 9-weeks post-spray in S-2013. During L-2014, the density of adults in the spray sector  
621 increased to well above that in the buffer. In L-2014, ULV spraying resulted in a higher  
622 proportion of nulliparous females, indicating a shift to a younger adult female age distribution.  
623 This indicates that the spray sector continued to have active larval habitats that were producing  
624 new *Ae. aegypti* adults. In S-2013, for example, 22 *Ae. aegypti* positive containers were  
625 identified in a single house during a post intervention survey, whereas the baseline survey of that  
626 house revealed only three containers total, of which only one was positive. This kind of variation  
627 illustrates the stochastic and dynamic nature of *Ae. aegypti* larval habitats (LaCon et al. 2014,  
628 Getis et al. 2003). The dramatic L-2014 post-treatment increase cannot, however, be explained  
629 by an outlier in the form of a “superproductive” household (Morrison et al. 2014). One  
630 possibility is compensation by the immature population due to a reduction in larval population  
631 densities, which led to reduced density dependent competition within containers and increased  
632 survival to adult emergence. This kind of rebound effect merits further investigation.

633         In L-2014, both emergency and experimental spraying had significant, but lesser impact  
634 on the adult densities than in S-2013, even though L-2014 post-spray surveys were conducted  
635 (on average) fewer days after spray applications. The L-2014 24-hour mortality of caged sentinel  
636 mosquitoes was lower than in S-2013, something that could be due to characteristics of the  
637 different insecticide used, changes in pyrethroid resistance levels in Iquitos mosquito populations  
638 between S-2013 and L-2014, and/or differences in spray quality between the two experiments.  
639 By the end of 2014, significant pyrethroid resistance was detected in Iquitos (Palomino, INS  
640 report). Although we did not detect pyrethroid resistance before the S-2013 experiment, we do

641 not have similar assay information from populations evaluated just prior to the L-2014  
642 experiment. It is possible, therefore, that the lower efficacy observed in the L-2014 experiment  
643 was due in part to resistance in the local *Ae. aegypti* population. By 2015 the MoH had  
644 abandoned use of pyrethroid insecticides for indoor spraying and switched to malathion in an  
645 effort to improve efficacy.

646 A strong argument can be made that logistical challenges associated with application of  
647 ULV spray over a larger sector in the L-2014 experiment contributed to lower efficacy. First,  
648 Colt hand-held sprayers were only used in L-2014 when initially unsprayed houses were  
649 revisited, whereas in S-2013 they were used on at least 33% of the houses. Colt-sprayers had  
650 significantly better and consistent droplet sizes than backpack sprayers. The L-2014 experiment  
651 was a much larger effort with at least double the number of backpack machines and MoH  
652 fumigators participating, and droplets were only evaluated on a fraction of the machines used. In  
653 addition, during the L-2014 experiment coverage rates were lower overall.

654 Our results demonstrate that intensive, carefully administered space spraying can  
655 temporarily decrease the number and average age of female *Ae. aegypti* in houses. These results  
656 support smaller scale studies showing space spray induced reductions in *Ae. aegypti* density  
657 (Perich et al. 2000, 2001, 2003; Koenraadt et al. 2007). When, where, and how ULV mosquito  
658 control leads to meaningful reductions in disease remains a critical unanswered public health  
659 problem for policy makers. Computer simulation models have been employed to inform  
660 outcomes in limited situations, such as pathogen strain invasions [62] (e.g. Newton and Reiter  
661 1992). Certain tentative recommendations, however, can be made based on existing data.  
662 Emergency indoor ULV spray interventions have the potential to mitigate *Ae. aegypti*-  
663 transmitted viruses, but coverage must be maximized with multiple spray cycles per house; i.e.,

664 at least 3 spray cycles based on our experience in Iquitos (Morrison and Scott, unpublished data).  
665 Officials should have no expectations of sustained reductions in mosquito densities and must  
666 recognize that these sprays only have the potential to mitigate the immediate impact of an  
667 arbovirus outbreak. Quality control of spraying efforts and insecticide resistance testing must be  
668 an integrated component of national programs. Although these are not new messages (WHO  
669 citations), our study adds new data to the vector control evidence base that we hope will better  
670 inform intervention programs and, thus, help refine policy for the application of space spray as a  
671 public health response to *Ae. aegypti*-transmitted viruses.

672

673

## 674 **References**

675 Lenth, R.V. 2016. Least-Squares Means: The R Package lsmeans. *J. Statistical Software*. 69: 1-  
676 33.

677

678 Wilder-Smith, A., D.J. Gubler, S.C. Weaver, T.P. Monath, D. Heymann, and T.W. Scott. 2017.  
679 Epidemic arboviral diseases: priorities for research and public health. *Lancet Infectious Dis*. 17:  
680 e101-106.

681 Getis, A., A.C. Morrison, K. Gray, and T.W. Scott. 2003. Characteristics of the spatial pattern of  
682 the dengue vector, *Aedes aegypti*, in Iquitos, Peru. *Am. J. Trop. Med. Hyg*. 69: 494-505.

683

684

685 1. Brady OJ, Gething PW, Bhatt S, Messina JP, Brownstein JS, Hoen AG, et al. Refining  
686 the global spatial limits of dengue virus transmission by evidence-based consensus. *PLoS Negl*  
687 *Trop Dis*. 2012;6(8):e1760. doi: 10.1371/journal.pntd.0001760. PubMed PMID: 22880140;  
688 PubMed Central PMCID: PMC3413714.

- 689 2. Bhatt S, Gething PW, Brady OJ, Messina JP, Farlow AW, Moyes CL, et al. The global  
690 distribution and burden of dengue. *Nature*. 2013;496(7446):504-7. doi: 10.1038/nature12060.  
691 PubMed PMID: 23563266; PubMed Central PMCID: PMCPMC3651993.
- 692 3. Wilder-Smith A, Byass P. The elusive global burden of dengue. *Lancet Infect Dis*.  
693 2016;16(6):629-31. doi: 10.1016/S1473-3099(16)00076-1. PubMed PMID: 26874620.
- 694 4. Esu E, Lenhart A, Smith L, Horstick O. Effectiveness of peridomestic space spraying  
695 with insecticide on dengue transmission; systematic review. *Trop Med Int Health*.  
696 2010;15(5):619-31. doi: 10.1111/j.1365-3156.2010.02489.x. PubMed PMID: 20214764.
- 697 5. Simmons CP, Farrar JJ, Nguyen v V, Wills B. Dengue. *N Engl J Med*.  
698 2012;366(15):1423-32. doi: 10.1056/NEJMra1110265. PubMed PMID: 22494122.
- 699 6. Weaver SC, Forrester NL. Chikungunya: Evolutionary history and recent epidemic  
700 spread. *Antiviral Res*. 2015;120:32-9. doi: 10.1016/j.antiviral.2015.04.016. PubMed PMID:  
701 25979669.
- 702 7. Weaver SC, Costa F, Garcia-Blanco MA, Ko AI, Ribeiro GS, Saade G, et al. Zika virus:  
703 History, emergence, biology, and prospects for control. *Antiviral Res*. 2016;130:69-80. doi:  
704 10.1016/j.antiviral.2016.03.010. PubMed PMID: 26996139; PubMed Central PMCID:  
705 PMCPMC4851879.
- 706 8. Kuno G. Review of the factors modulating dengue transmission. *Epidemiol Rev*.  
707 1995;17(2):321-35. Epub 1995/01/01. PubMed PMID: 8654514.
- 708 9. Scott TW, Takken W. Feeding strategies of anthropophilic mosquitoes result in increased  
709 risk of pathogen transmission. *Trends Parasitol*. 2012;28(3):114-21. doi:  
710 10.1016/j.pt.2012.01.001. PubMed PMID: 22300806.
- 711 10. Perich MJ, Davila G, Turner A, Garcia A, Nelson M. Behavior of resting *Aedes aegypti*  
712 (*Culicidae*: *Diptera*) and its relation to ultra-low volume adulticide efficacy in Panama City,  
713 Panama. *J Med Entomol*. 2000;37(4):541-6. PubMed PMID: 10916294.
- 714 11. Ritchie SA. Dengue Vector Bionomics: Why *Aedes aegypti* is Such a Good Vector. In:  
715 Gubler DJ, Ooi EE, Vasudevan SG, Farrar J, editors. *Dengue and dengue hemorrhagic fever*. 2nd  
716 edition. ed. Wallingford, Oxfordshire ; Boston, MA: C.A.B. International; 2014. p. 455-80.
- 717 12. Reiter P. Surveillance and Control of Urban Dengue Vectors. In: Gubler DJ, Ooi EE,  
718 Vasudevan SG, Farrar J, editors. *Dengue and dengue hemorrhagic fever*. 2nd edition. ed.  
719 Wallingford, Oxfordshire ; Boston, MA: C.A.B. International; 2014. p. 484-521.
- 720 13. Edman JD, Scott TW, Costero A, Morrison AC, Harrington LC, Clark GG. *Aedes*  
721 *aegypti* (*Diptera*: *Culicidae*) movement influenced by availability of oviposition sites. *J Med*  
722 *Entomol*. 1998;35(4):578-83. Epub 1998/08/14. PubMed PMID: 9701948.
- 723 14. Harrington LC, Edman JD, Scott TW. Why do female *Aedes aegypti* (*Diptera*: *Culicidae*)  
724 feed preferentially and frequently on human blood? *J Med Entomol*. 2001;38(3):411-22. Epub  
725 2001/05/25. PubMed PMID: 11372967.
- 726 15. Harrington LC, Scott TW, Lerdthusnee K, Coleman RC, Costero A, Clark GG, et al.  
727 Dispersal of the dengue vector *Aedes aegypti* within and between rural communities. *Am J Trop*  
728 *Med Hyg*. 2005;72(2):209-20. Epub 2005/03/03. doi: 72/2/209 [pii]. PubMed PMID: 15741559.
- 729 16. WHO/TDR, editor. *Dengue: guidelines for diagnosis, treatment, prevention and control --*  
730 *New edition*2009.
- 731 17. Scott TW, Naksathit A, Day JF, Kittayapong P, Edman JD. A fitness advantage for  
732 *Aedes aegypti* and the viruses it transmits when females feed only on human blood. *Am J Trop*  
733 *Med Hyg*. 1997;57(2):235-9. Epub 1997/08/01. PubMed PMID: 9288822.

- 734 18. Scott TW, Amerasinghe PH, Morrison AC, Lorenz LH, Clark GG, Strickman D, et al.  
735 Longitudinal studies of *Aedes aegypti* (Diptera: Culicidae) in Thailand and Puerto Rico: blood  
736 feeding frequency. *J Med Entomol.* 2000;37(1):89-101. Epub 2004/06/29. PubMed PMID:  
737 15218911.
- 738 19. Morrison AC, Zielinski-Gutierrez E, Scott TW, Rosenberg R. Defining challenges and  
739 proposing solutions for control of the virus vector *Aedes aegypti*. *PLoS Med.* 2008;5(3):e68.  
740 Epub 2008/03/21. doi: 07-PLME-PF-2051 [pii]  
741 10.1371/journal.pmed.0050068. PubMed PMID: 18351798; PubMed Central PMCID:  
742 PMC2267811.
- 743 20. Perich MJ, Sherman C, Burge R, Gill E, Quintana M, Wirtz RA. Evaluation of the  
744 efficacy of lambda-cyhalothrin applied as ultra-low volume and thermal fog for emergency  
745 control of *Aedes aegypti* in Honduras. *J Am Mosq Control Assoc.* 2001;17(4):221-4. PubMed  
746 PMID: 11804457.
- 747 21. Perich MJ, Rocha NO, Castro AL, Alfaro AW, Platt KB, Solano T, et al. Evaluation of  
748 the efficacy of lambda-cyhalothrin applied by three spray application methods for emergency  
749 control of *Aedes aegypti* in Costa Rica. *J Am Mosq Control Assoc.* 2003;19(1):58-62. PubMed  
750 PMID: 12674536.
- 751 22. Koenraadt CJ, Aldstadt J, Kijchalao U, Kengluacha A, Jones JW, Scott TW. Spatial and  
752 temporal patterns in the recovery of *Aedes aegypti* (Diptera: Culicidae) populations after  
753 insecticide treatment. *J Med Entomol.* 2007;44(1):65-71. Epub 2007/02/14. PubMed PMID:  
754 17294922.
- 755 23. Bowman LR, Donegan S, McCall PJ. Is Dengue Vector Control Deficient in  
756 Effectiveness or Evidence?: Systematic Review and Meta-analysis. *PLoS Negl Trop Dis.*  
757 2016;10(3):e0004551. doi: 10.1371/journal.pntd.0004551. PubMed PMID: 26986468; PubMed  
758 Central PMCID: PMC4795802.
- 759 24. Pant CP, Mathis HL, Nelson MJ, Phanthumachinda B. A large-scale field trial of ultra-  
760 low-volume fenitrothion applied by a portable mist blower for the control of *Aedes aegypti*. *Bull*  
761 *World Health Organ.* 1974;51(4):409-15. PubMed PMID: 4549492; PubMed Central PMCID:  
762 PMC4795802.
- 763 25. Castro M, Quintana N, Quinones PM. [Evaluating two pyrethroids in dengue vector  
764 control in Putumayo, Colombia]. *Rev Salud Publica (Bogota).* 2007;9(1):106-16. PubMed  
765 PMID: 17502968.
- 766 26. World Health Organization ROFS-EA. Comprehensive guidelines for prevention and  
767 control of dengue and dengue haemorrhagic fever. Revised and expanded edition. New Delhi:  
768 WHO Regional Office for South-East Asia; 2011. Available from:  
769 <http://www.who.int/iris/handle/10665/204894>.
- 770 27. Getis A, Morrison AC, Gray K, Scott TW. Characteristics of the spatial pattern of the  
771 dengue vector, *Aedes aegypti*, in Iquitos, Peru. *Am J Trop Med Hyg.* 2003;69(5):494-505. Epub  
772 2003/12/26. PubMed PMID: 14695086.
- 773 28. LaCon G, Morrison AC, Astete H, Stoddard ST, Paz-Soldan VA, Elder JP, et al. Shifting  
774 patterns of *Aedes aegypti* fine scale spatial clustering in Iquitos, Peru. *PLoS Negl Trop Dis.*  
775 2014;8(8):e3038. doi: 10.1371/journal.pntd.0003038. PubMed PMID: 25102062; PubMed  
776 Central PMCID: PMC4125221.
- 777 29. Morrison AC, Astete H, Chapilliquen F, Ramirez-Prada C, Diaz G, Getis A, et al.  
778 Evaluation of a sampling methodology for rapid assessment of *Aedes aegypti* infestation levels

- 779 in Iquitos, Peru. *J Med Entomol.* 2004;41(3):502-10. Epub 2004/06/10. PubMed PMID:  
780 15185957.
- 781 30. Morrison AC, Gray K, Getis A, Astete H, Sihuincha M, Focks D, et al. Temporal and  
782 geographic patterns of *Aedes aegypti* (Diptera: Culicidae) production in Iquitos, Peru. *J Med*  
783 *Entomol.* 2004;41(6):1123-42. Epub 2004/12/21. PubMed PMID: 15605653.
- 784 31. Forshey BM, Guevara C, Laguna-Torres VA, Cespedes M, Vargas J, Gianella A, et al.  
785 Arboviral etiologies of acute febrile illnesses in Western South America, 2000-2007. *PLoS*  
786 *neglected tropical diseases.* 2010;4(8):e787. doi: 10.1371/journal.pntd.0000787. PubMed PMID:  
787 20706628; PubMed Central PMCID: PMC2919378.
- 788 32. Morrison AC, Minnick SL, Rocha C, Forshey BM, Stoddard ST, Getis A, et al.  
789 Epidemiology of dengue virus in Iquitos, Peru 1999 to 2005: interepidemic and epidemic  
790 patterns of transmission. *PLoS Negl Trop Dis.* 2010;4(5):e670. Epub 2010/05/11. doi:  
791 10.1371/journal.pntd.0000670. PubMed PMID: 20454609; PubMed Central PMCID:  
792 PMC2864256.
- 793 33. Rocha C, Morrison AC, Forshey BM, Blair PJ, Olson JG, Stancil JD, et al. Comparison  
794 of two active surveillance programs for the detection of clinical dengue cases in Iquitos, Peru.  
795 *Am J Trop Med Hyg.* 2009;80(4):656-60. Epub 2009/04/07. doi: 80/4/656 [pii]. PubMed PMID:  
796 19346395.
- 797 34. Stoddard ST, Forshey BM, Morrison AC, Paz-Soldan VA, Vazquez-Prokopec GM,  
798 Astete H, et al. House-to-house human movement drives dengue virus transmission. *Proc Natl*  
799 *Acad Sci U S A.* 2013;110(3):994-9. doi: 10.1073/pnas.1213349110. PubMed PMID: 23277539;  
800 PubMed Central PMCID: PMC3549073.
- 801 35. Stoddard ST, Wearing HJ, Reiner RC, Jr., Morrison AC, Astete H, Vilcarrromero S, et al.  
802 Long-term and seasonal dynamics of dengue in Iquitos, Peru. *PLoS Negl Trop Dis.*  
803 2014;8(7):e3003. doi: 10.1371/journal.pntd.0003003. PubMed PMID: 25033412; PubMed  
804 Central PMCID: PMC34102451.
- 805 36. Morrison A, Astete H, Rocha C, Lopez V, Olson J, Kochel T, et al. Impact of the dengue  
806 vector control system (DVCS) on *Aedes aegypti* populations in Iquitos, Peru 2004-2005.  
807 *American Journal of Tropical Medicine and Hygiene.* 2005;73(6):326-. PubMed PMID:  
808 WOS:000202990001415.
- 809 37. Morrison AC, Astete H, C. R, H. R, G.A. S, F. A, et al. Evaluation of Emergency Vector  
810 Control Measures during a Dengue Epidemic in Iquitos, Peru 2002-2003. *American Journal of*  
811 *Tropical Medicine and Hygiene.* 2003;Abstract.
- 812 38. Legros M, Magori K, Morrison AC, Xu C, Scott TW, Lloyd AL, et al. Evaluation of  
813 Location-Specific Predictions by a Detailed Simulation Model of *Aedes aegypti* Populations.  
814 *PLoS One.* 2011;6(7):e22701. Epub 2011/07/30. doi: 10.1371/journal.pone.0022701  
815 PONE-D-10-05874 [pii]. PubMed PMID: 21799936; PubMed Central PMCID: PMC3143176.
- 816 39. Magori K, Legros M, Puente ME, Focks DA, Scott TW, Lloyd AL, et al. Skeeter Buster:  
817 a stochastic, spatially explicit modeling tool for studying *Aedes aegypti* population replacement  
818 and population suppression strategies. *PLoS Negl Trop Dis.* 2009;3(9):e508. Epub 2009/09/02.  
819 doi: 10.1371/journal.pntd.0000508. PubMed PMID: 19721700; PubMed Central PMCID:  
820 PMC2728493.
- 821 40. Morrison AC, Sihuincha M, Stancil JD, Zamora E, Astete H, Olson JG, et al. *Aedes*  
822 *aegypti* (Diptera: Culicidae) production from non-residential sites in the Amazonian city of  
823 Iquitos, Peru. *Ann Trop Med Parasitol.* 2006;100 Suppl 1:S73-S86. Epub 2006/04/25. doi:  
824 10.1179/136485906X105534. PubMed PMID: 16630393.

- 825 41. Schneider JR, Morrison AC, Astete H, Scott TW, Wilson ML. Adult size and distribution  
826 of *Aedes aegypti* (Diptera: Culicidae) associated with larval habitats in Iquitos, Peru. *J Med*  
827 *Entomol.* 2004;41(4):634-42. Epub 2004/08/18. PubMed PMID: 15311454.
- 828 42. Watts DM, Porter KR, Putvatana P, Vasquez B, Calampa C, Hayes CG, et al. Failure of  
829 secondary infection with American genotype dengue 2 to cause dengue haemorrhagic fever.  
830 *Lancet.* 1999;354(9188):1431-4. Epub 1999/10/30. doi: S0140-6736(99)04015-5 [pii]  
831 10.1016/S0140-6736(99)04015-5. PubMed PMID: 10543670.
- 832 43. Hayes CG, Phillips IA, Callahan JD, Griebenow WF, Hyams KC, Wu SJ, et al. The  
833 epidemiology of dengue virus infection among urban, jungle, and rural populations in the  
834 Amazon region of Peru. *Am J Trop Med Hyg.* 1996;55(4):459-63. Epub 1996/10/01. PubMed  
835 PMID: 8916809.
- 836 44. Paz-Soldan VA, Plasai V, Morrison AC, Rios-Lopez EJ, Guedez-Gonzales S, Grieco JP,  
837 et al. Initial assessment of the acceptability of a Push-Pull *Aedes aegypti* control strategy in  
838 Iquitos, Peru and Kanchanaburi, Thailand. *Am J Trop Med Hyg.* 2011;84(2):208-17. Epub  
839 2011/02/05. doi: 84/2/208 [pii]  
840 10.4269/ajtmh.2011.09-0615. PubMed PMID: 21292886; PubMed Central PMCID:  
841 PMC3029169.
- 842 45. Palomino-Salcedo M. [Estado de susceptibilidad de la población natural de *Aedes aegypti*  
843 a los insecticidas en Punchana-Iquitos, Región Loreto (Noviembre 2014). Instituto Nacional de  
844 Salud, Peru, 2014.
- 845 46. Vazquez-Prokopec GM, Galvin WA, Kelly R, Kitron U. A new, cost-effective, battery-  
846 powered aspirator for adult mosquito collections. *J Med Entomol.* 2009;46(6):1256-9. Epub  
847 2009/12/08. PubMed PMID: 19960668; PubMed Central PMCID: PMC2800949.
- 848 47. Focks DA, Brenner RJ, Hayes J, Daniels E. Transmission thresholds for dengue in terms  
849 of *Aedes aegypti* pupae per person with discussion of their utility in source reduction efforts. *Am*  
850 *J Trop Med Hyg.* 2000;62(1):11-8. Epub 2000/04/13. PubMed PMID: 10761719.
- 851 48. Focks DA, Chadee DD. Pupal survey: an epidemiologically significant surveillance  
852 method for *Aedes aegypti*: an example using data from Trinidad. *Am J Trop Med Hyg.*  
853 1997;56(2):159-67. Epub 1997/02/01. PubMed PMID: 9080874.
- 854 49. Focks DA, Haile DG, Daniels E, Mount GA. Dynamic life table model for *Aedes aegypti*  
855 (Diptera: Culicidae): analysis of the literature and model development. *J Med Entomol.*  
856 1993;30(6):1003-17. Epub 1993/11/01. PubMed PMID: 8271242.
- 857 50. Organization WH. Report of the Eighth WHOPEs Working Group Meeting. Guidelines  
858 for laboratory and field testing of mosquito larvicides. Geneva, Switzerland: 2005 Contract No.:  
859 WHO/CDS/WHOPEs/GCDPP/2005.13.
- 860 51. Reiter P, Nathan MB. Report of the WHO Informal Consultation on the evaluation and  
861 testing of insecticides-Guía para la evaluación de la eficacia del rociado espacial de insecticidas  
862 para el control del dengue. Geneva, Switzerland: World Health Organization, 2003 Contract  
863 No.: WHO/CTD/WHOPEs/IC/96.1.
- 864 52. Zeileis A, Kleiber C, Jackman S. Regression Models for Count Data in R. *Journal of*  
865 *Statistical Software.* 2008;27(1):1-25. doi: 10.18637/jss.v027.i08.
- 866 53. Lenth R. Lsmeans: Least-Squares Means 2015. Available from: [https://CRAN.R-](https://CRAN.R-project.org/package=lsmeans)  
867 [project.org/package=lsmeans](https://CRAN.R-project.org/package=lsmeans).
- 868 54. James S, Simmons CP, James AA. Ecology. Mosquito trials. *Science.*  
869 2011;334(6057):771-2. doi: 10.1126/science.1213798. PubMed PMID: 22076370.



- 870 55. Andersson N, Nava-Aguilera E, Arostegui J, Morales-Perez A, Suazo-Laguna H,  
871 Legorreta-Soberanis J, et al. Evidence based community mobilization for dengue prevention in  
872 Nicaragua and Mexico (Camino Verde, the Green Way): cluster randomized controlled trial.  
873 *BMJ*. 2015;351:h3267. doi: 10.1136/bmj.h3267. PubMed PMID: 26156323; PubMed Central  
874 PMCID: PMCPMC4495677.
- 875 56. Achee NL, Gould F, Perkins TA, Reiner RC, Jr., Morrison AC, Ritchie SA, et al. A  
876 critical assessment of vector control for dengue prevention. *PLoS Negl Trop Dis*.  
877 2015;9(5):e0003655. doi: 10.1371/journal.pntd.0003655. PubMed PMID: 25951103; PubMed  
878 Central PMCID: PMCPMC4423954.
- 879 57. Runge-Ranzinger S, Kroeger A, Oliaro P, McCall PJ, Sanchez Tejada G, Lloyd LS, et al.  
880 Dengue Contingency Planning: From Research to Policy and Practice. *PLoS Negl Trop Dis*.  
881 2016;10(9):e0004916. doi: 10.1371/journal.pntd.0004916. PubMed PMID: 27653786.
- 882 58. Newton EA, Reiter P. A model of the transmission of dengue fever with an evaluation of  
883 the impact of ultra-low volume (ULV) insecticide applications on dengue epidemics. *Am J Trop*  
884 *Med Hyg*. 1992;47(6):709-20. Epub 1992/12/01. PubMed PMID: 1361721.
- 885 59. Reiner RC, Jr., Achee N, Barrera R, Burkot TR, Chadee DD, Devine GJ, et al.  
886 Quantifying the Epidemiological Impact of Vector Control on Dengue. *PLoS Negl Trop Dis*.  
887 2016;10(5):e0004588. doi: 10.1371/journal.pntd.0004588. PubMed PMID: 27227829; PubMed  
888 Central PMCID: PMCPMC4881945.

889

890

891

892

893

894

895

896

897

898

899

900

901

902

903

904

905

906

907

## Efficacy of *Aedes aegypti* control by ULV indoor spraying in Iquitos, Peru November 22, 2017

### Figures

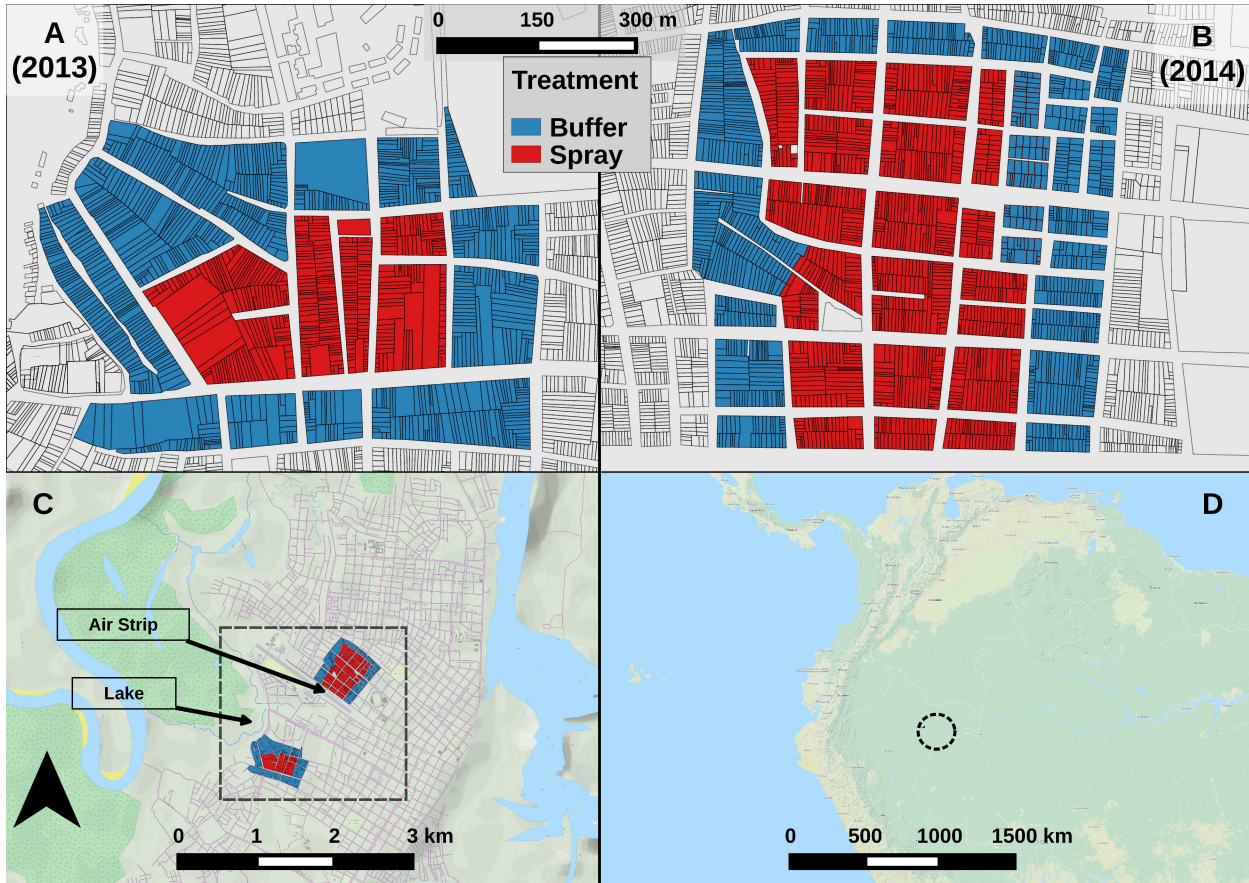

**Figure 1. Map of experiment areas. A, B:** Detail of experimental areas, showing individual houses. Color shows sector. **C:** City of Iquitos. Black box highlights experimental areas. **D:** Regional map. Black circle highlights Iquitos. See also Fig. S6.

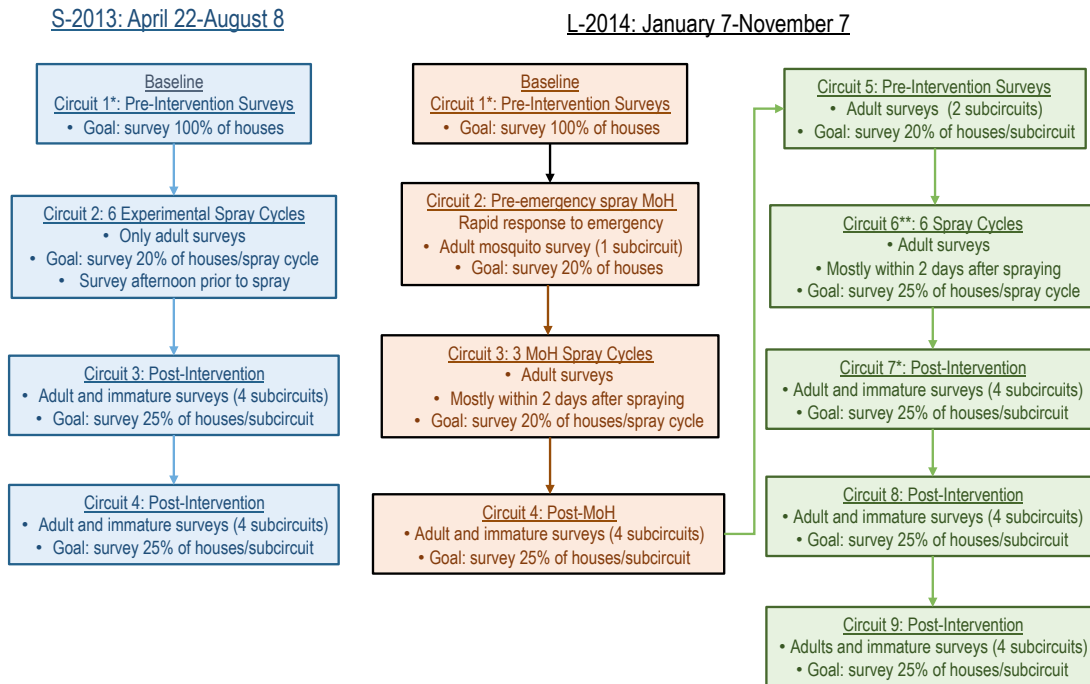

\* Denotes that surveying of subcircuits was not spatially systematic.

\*\*The first subcircuit of the post-intervention circuit (C7) was grouped with the experimental spray circuit (C6) due to temporal overlap with the spray period.

**Figure 2. Experiment timeline.** Each box shows one circuit. With one exception (L-2014 C2), each house was visited (and possibly surveyed) at least once per circuit. Except where noted, each circuit consisted of one or more spatially systematic subcircuits. Each subcircuit lasted approximately one calendar week. See Fig. S7 for survey maps.

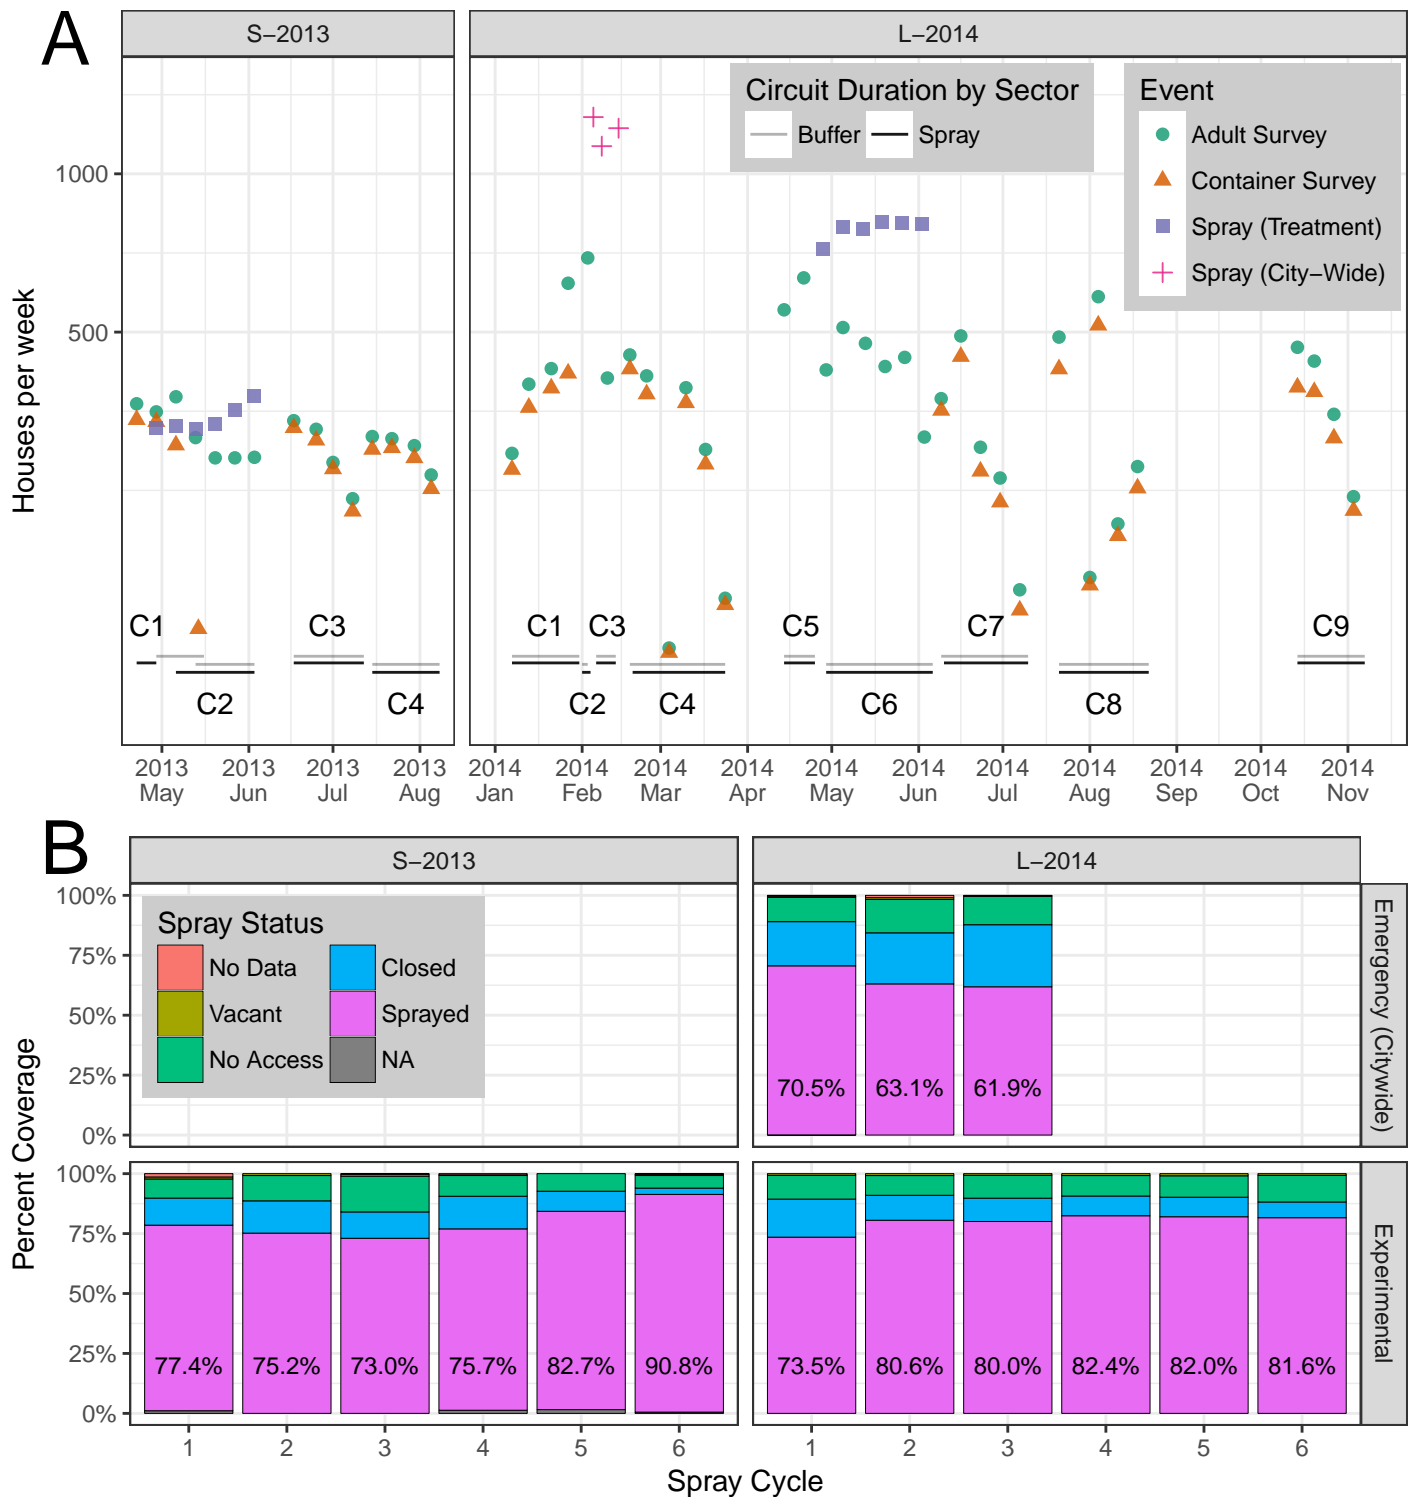

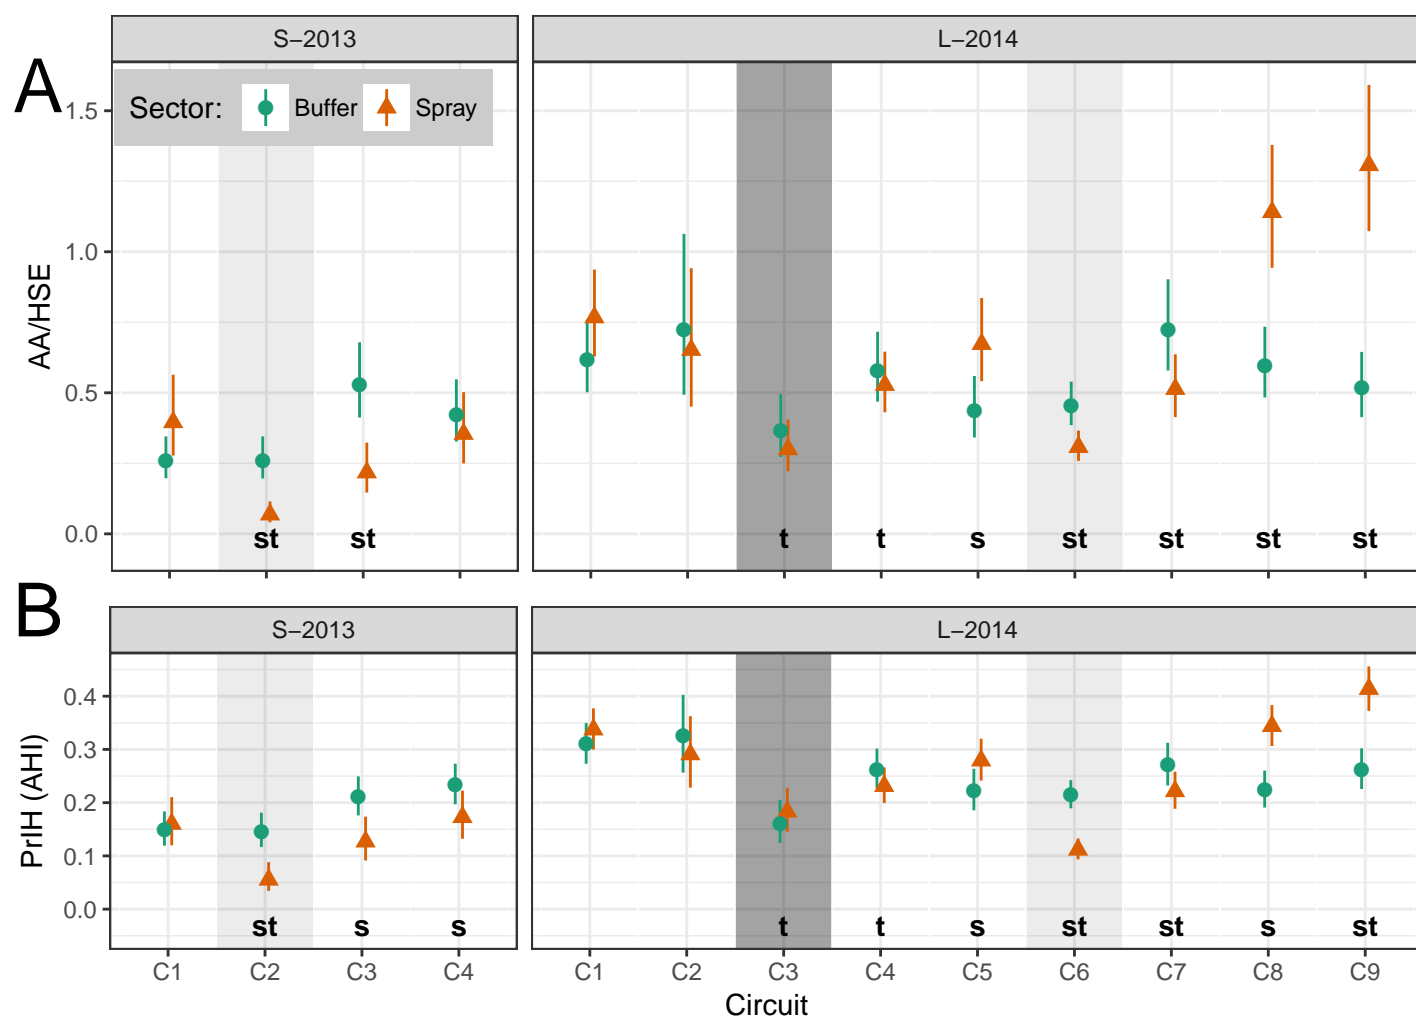

**Figure 4. [hypothesis2].** Model estimates of *Ae. aegypti* adults per house (AA/HSE, top row) and proportion infested houses (PrIH = AHI, bottom row). A separate generalized linear model (GLM) was constructed for each experiment (column) and for each measured response (row). **A: AA/HSE:** negative binomial GLM (NB-GLM). **B: PrIH:** logistic GLM (L-GLM). Models describe response of measure (row) to time period (X-axis) and treatment sector (color). Shading indicates spray events: experimental spraying (light ) and citywide spraying (dark). Vertical bars show 95% CI; non-overlapping CI indicate highly significant difference. Letters (s, t) indicate significant differences between pairwise contrasts: s, between sector (within time, Table S2); t, between time (within spray sector, relative to baseline C1, Table S3). See also Tables S6A-S6B, Tables S7A-S7B, and Fig. S5.

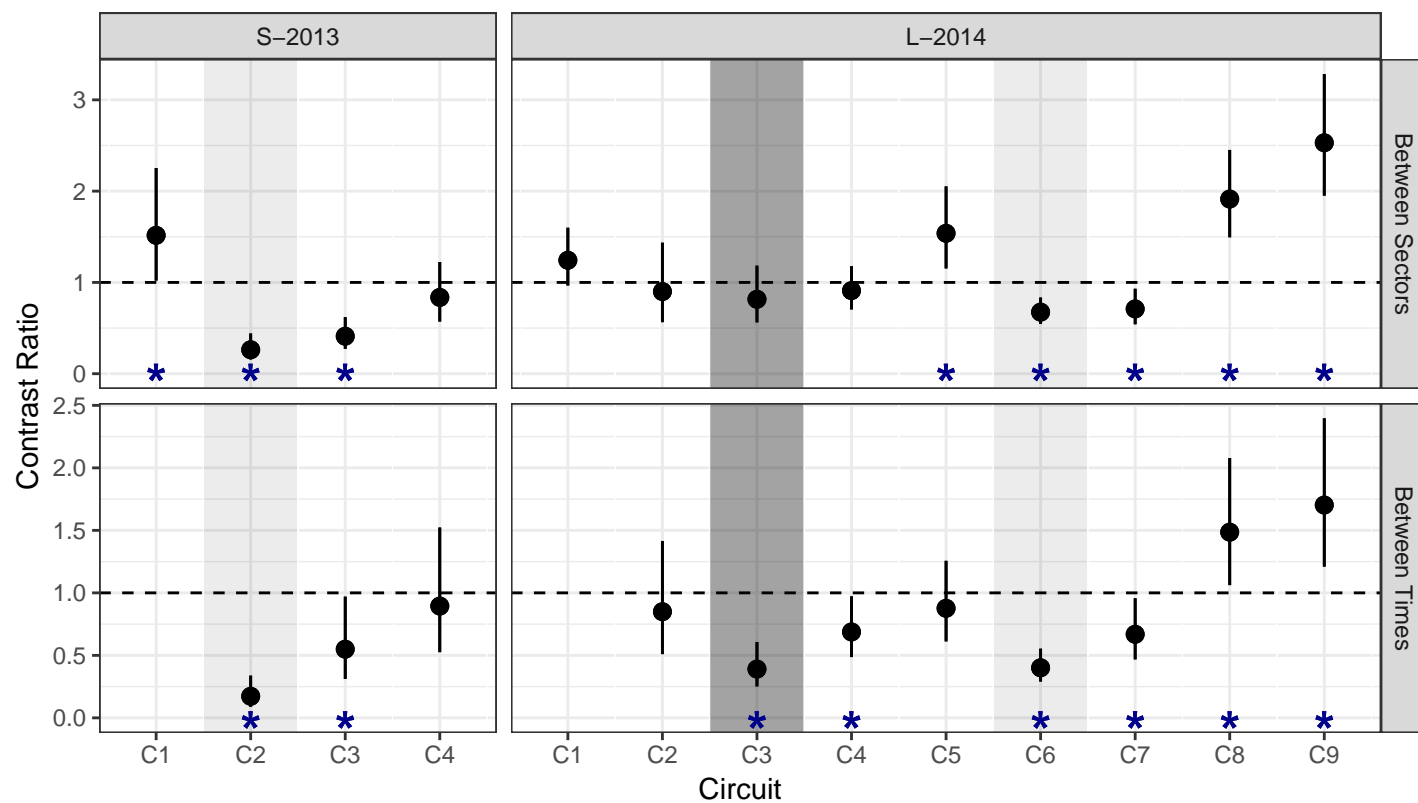

**Figure 5. [contrast]. Contrast Ratios of AA/HSE, based on NB-GLM models shown in Fig. 4A. Top row (between-sector): Spray/Buffer. Bottom row (between-time, within spray sector): contrast relative to baseline (C1). Vertical bars show 95% CI. Horizontal dashed line indicates  $H_0$  of equality (ratio = 1). Asterisks (\*) indicate significant difference between pairwise contrasts (reject  $H_0$ ).**

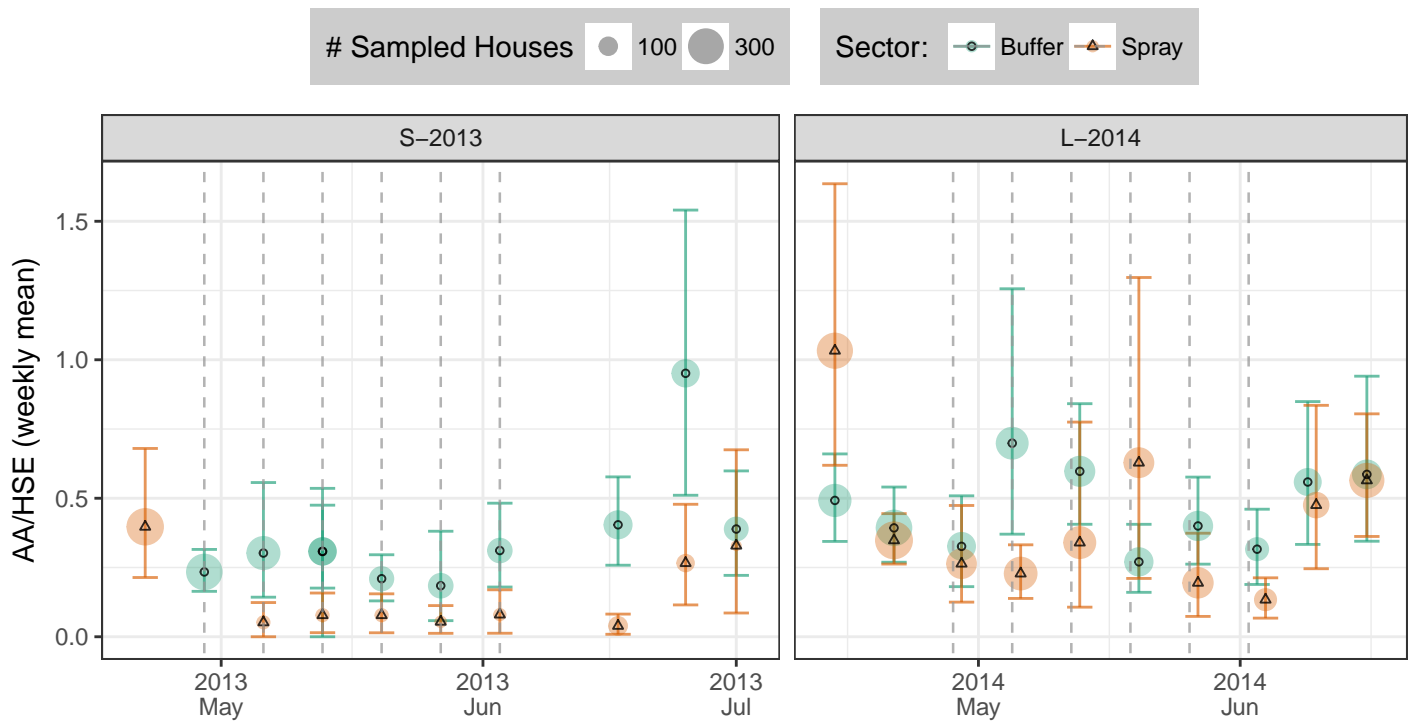

**Figure 6. [boot\_zoom]. Detailed time series of AA/HSE response to ULV spraying, aggregated by week.** X-axis shows week start date. Color and symbol shape shows sector (orange triangle: spray sector). Point size shows number of surveyed houses. Vertical dashed lines show approximate dates of experimental spraying (spray sector only). Vertical colored bars show bootstrap 95% CI (1e+04 draws per circuit).



## Tables

| Experiment | Sector | Houses | Surveys | Sampled Adults: |       | Sampled Containers: |       | Dissected Females: |       |
|------------|--------|--------|---------|-----------------|-------|---------------------|-------|--------------------|-------|
|            |        |        |         | Female          | Total | Positive            | Total | Nulliparous        | Total |
| S-2013     | Buffer | 765    | 2448    | 439             | 904   | 236                 | 5311  | 49                 | 406   |
| S-2013     | Spray  | 398    | 1395    | 153             | 354   | 109                 | 2170  | 23                 | 142   |
| L-2014     | Buffer | 1051   | 5810    | 1585            | 3165  | 251                 | 6811  | 81                 | 1444  |
| L-2014     | Spray  | 1110   | 6314    | 2092            | 4244  | 278                 | 7454  | 191                | 2004  |

**Table 1. [tab\_count]. Observation counts**, including houses, surveys, adults, containers, and adult female dissections (parity). Note that houses were surveyed repeatedly. Only *Ae. aegypti* mosquitoes are included here. Positive containers have visible eggs, larvae, or pupae. Nearly all sampled adult females (column 5) were dissected to determine parity status (columns 9 & 10). See also Table S1.

| Experiment | Assay              | nObs | Group | Est  | SE   | 95% CI    |
|------------|--------------------|------|-------|------|------|-----------|
| S-2013     | Kill (24 Hours)    | 112  | a     | 0.94 | 0.01 | 0.90-0.96 |
| L-2014     | Kill (24 Hours)    | 76   | b     | 0.75 | 0.05 | 0.62-0.84 |
| S-2013     | Knockdown (1 Hour) | 112  | a     | 0.94 | 0.02 | 0.86-0.97 |
| L-2014     | Knockdown (1 Hour) | 76   | b     | 0.65 | 0.10 | 0.41-0.83 |

**Table 2. [tab\_cage]. Effect of year on *Ae. aegypti* control cage knockdown and mortality**, showing a significant decrease in spray efficacy in L-2014. A separate logistic generalized linear mixed model (L-GLMM) was fit for each assay (separated by horizontal line). Year is a fixed effect. Spray cycle and house are nested random effects. Each cage contains 25 mosquitoes taken from a field-derived colony. See also Fig. S3.

## Supporting Information for *Efficacy of Aedes aegypti control by indoor Ultra Low Volume (ULV) spraying in Iquitos, Peru*

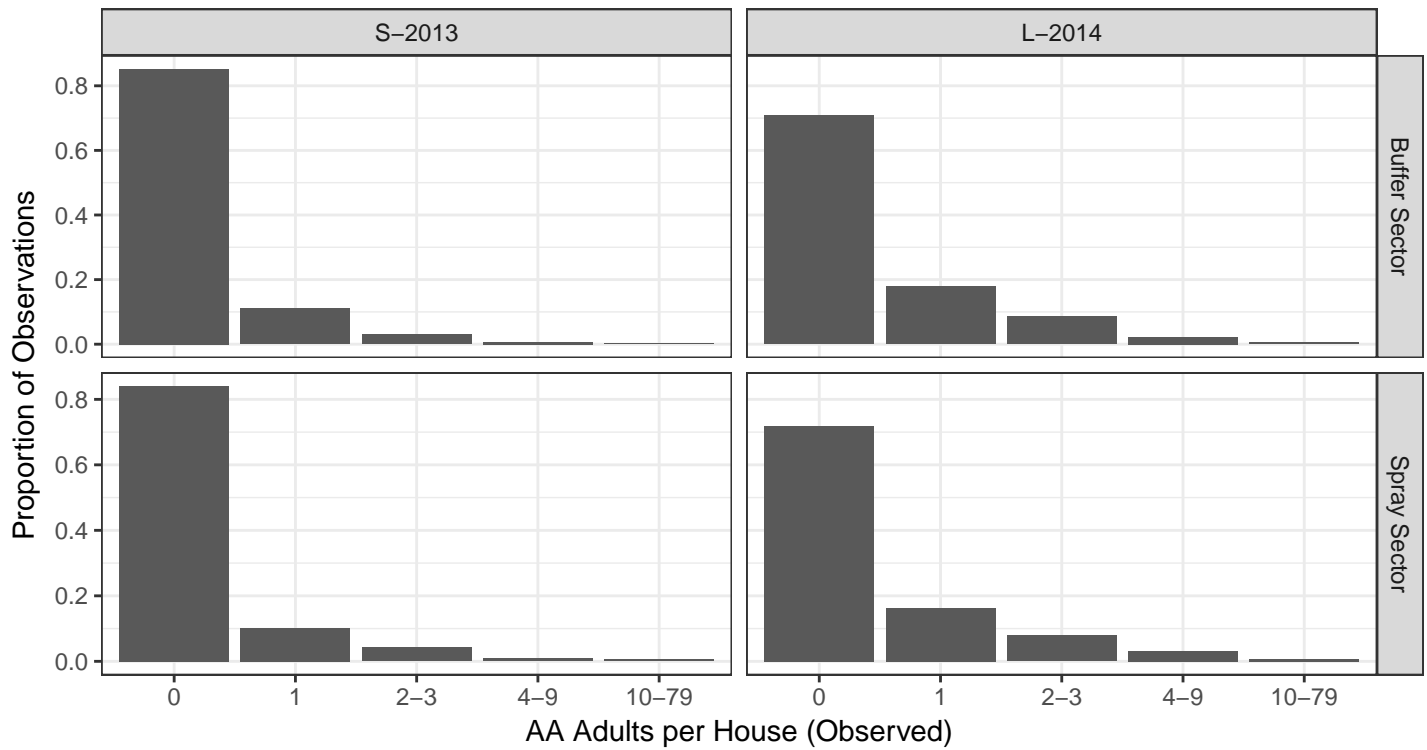

**Figure S1.** [adult\_baseline]. Histogram of AA/HSE at baseline (C1). Rows show treatment sector. X-axis is sqrt-scaled. The majority of house surveys find no adults.

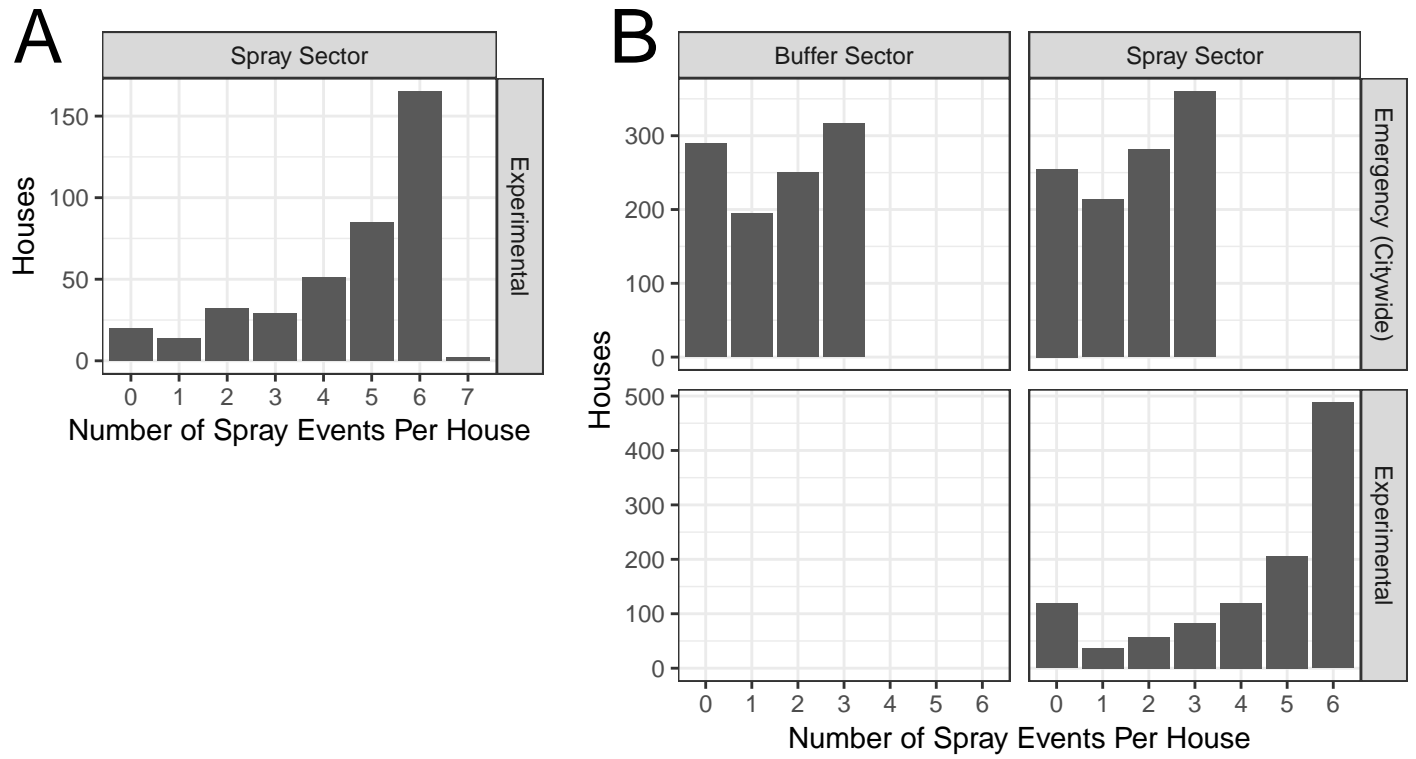

**Figure S2.** [spray\_hist]. Summary of spray coverage in S-2013 (**A**) and L-2014 (**B**). In both years, most houses were sprayed in at least 5 out of 6 spray cycles, while a small number of houses were never sprayed. In L-2014, experimental spray coverage was much higher than emergency (citywide) spray coverage.

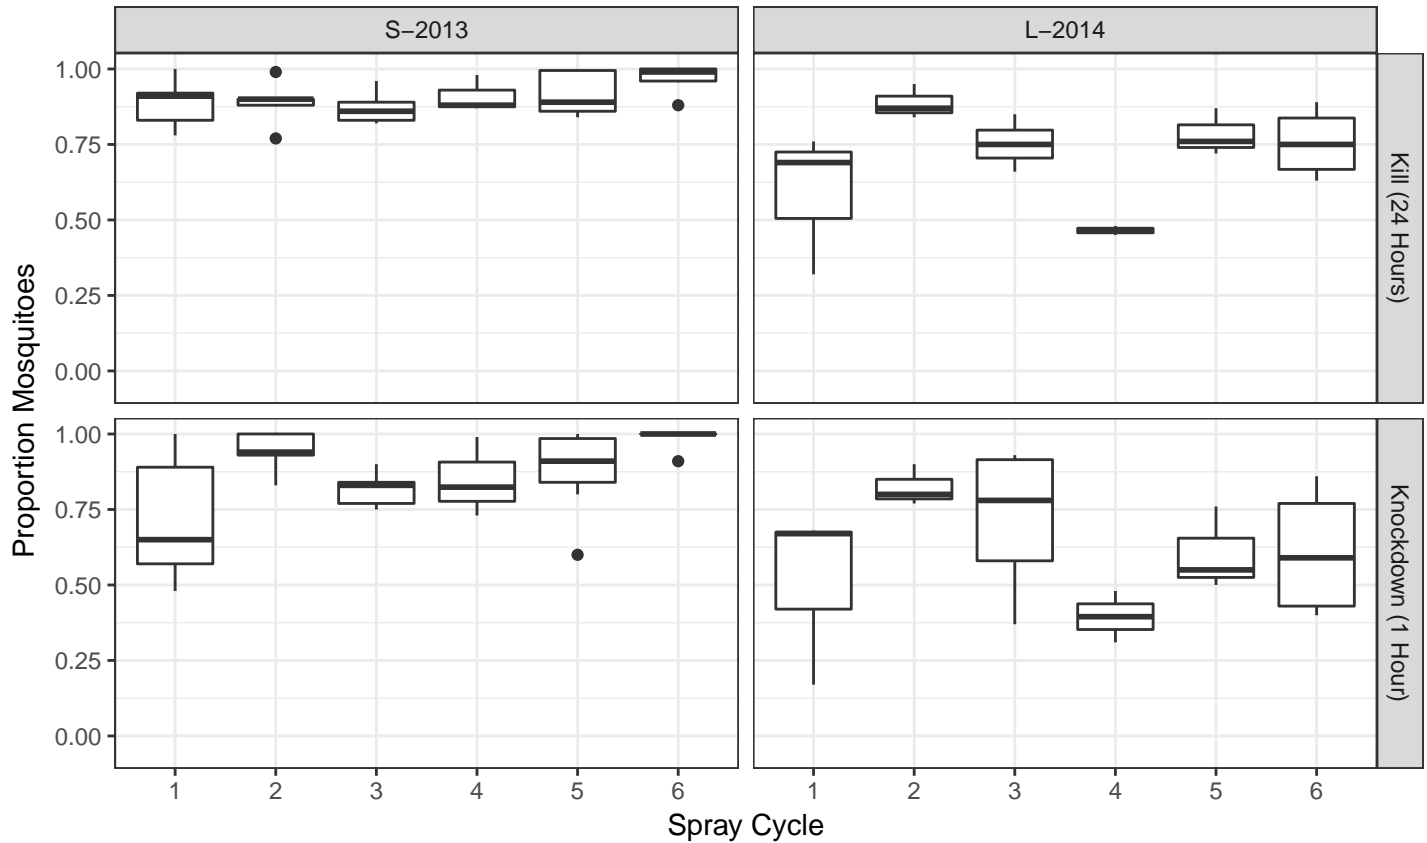

**Figure S3.** [cage]. Boxplot of control cage house means: 25 adults per cage, 4 cages per house, approx 5 houses per spray cycle. Insects were from a laboratory colony (one colony per year).

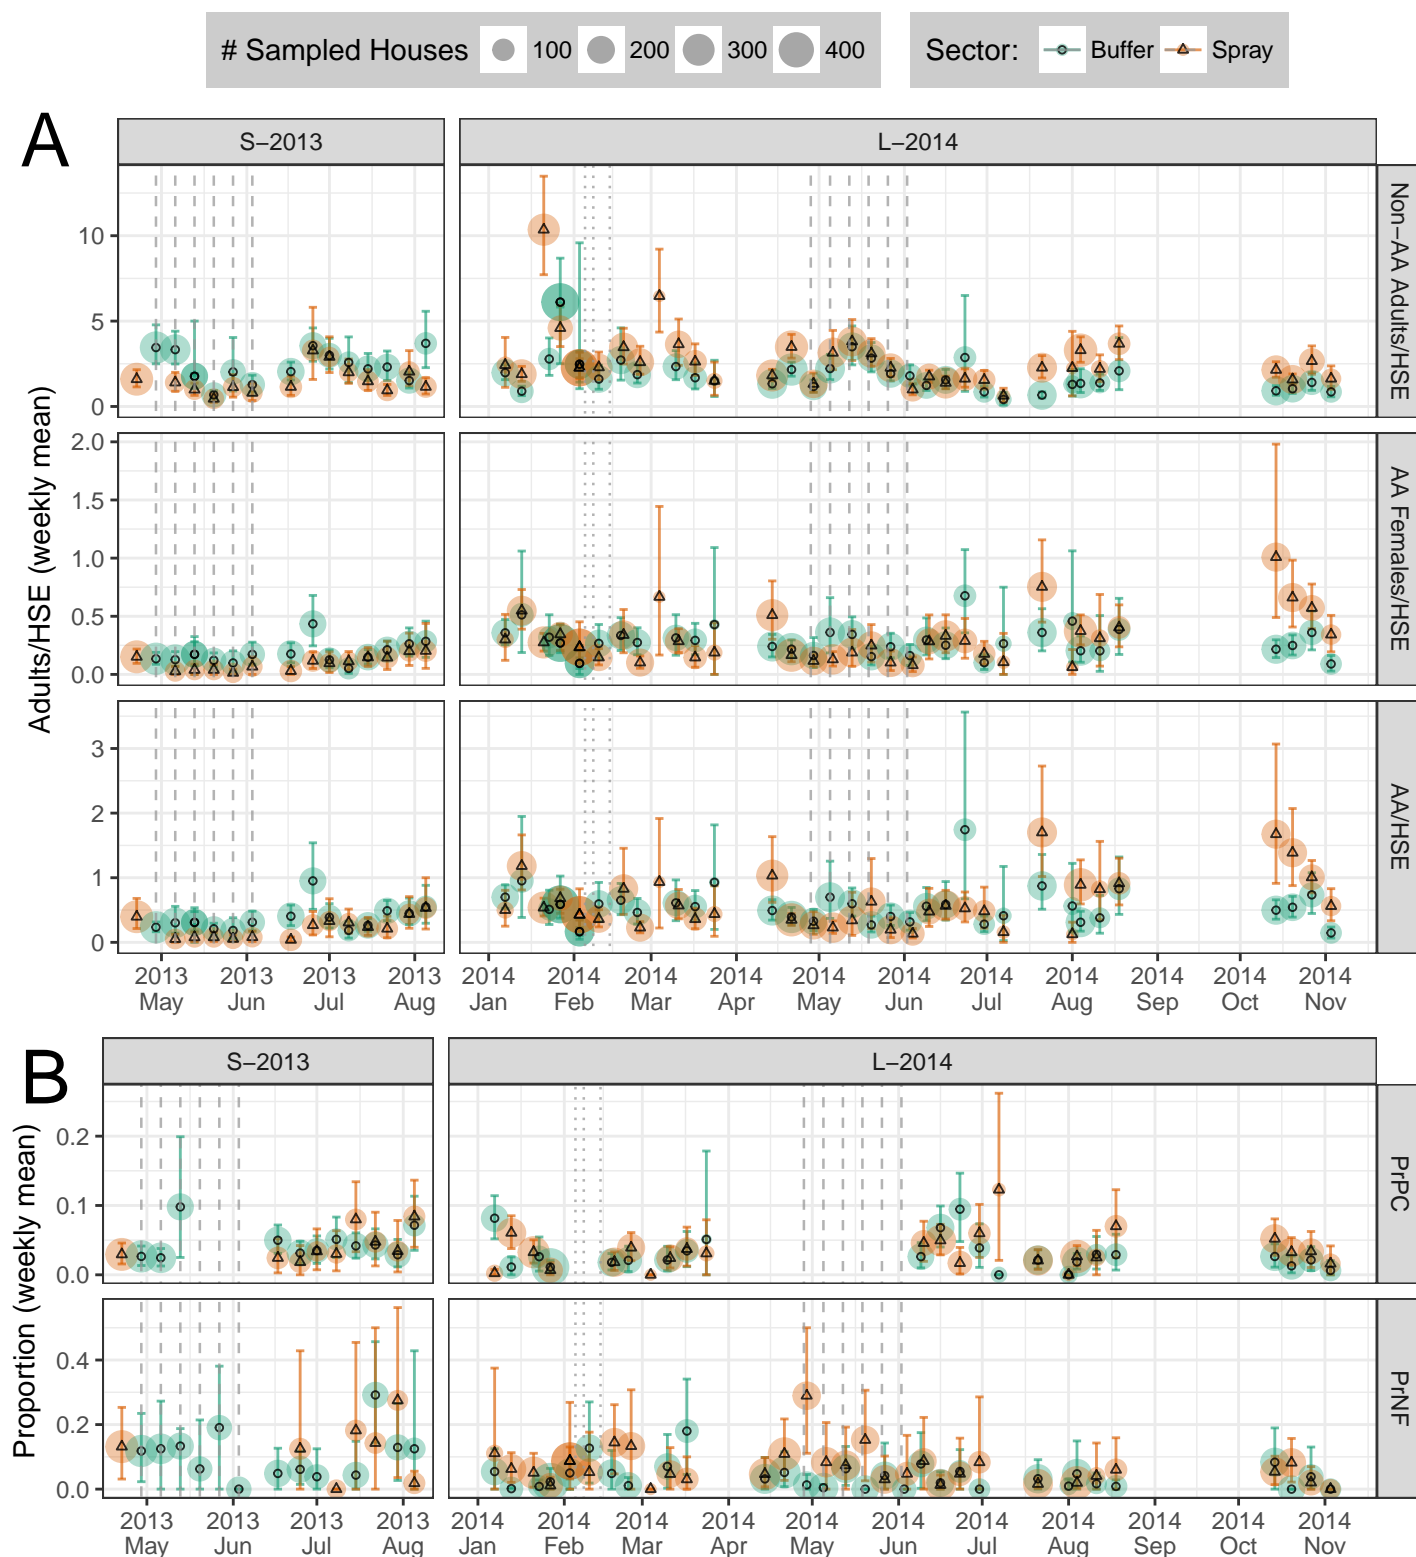

**Figure S4. [ts]. Time series of survey results**, aggregated by week. X-axis shows week start date. Color and line-type shows treatment sector (orange dashed = Spray Sector). Point size shows number of surveyed houses. Vertical lines show approximate spray dates: dashed, experimental spraying (spray sector only); dotted, citywide spraying (Feb 2014, all sectors). Vertical colored bars show bootstrap 95% CI (1e+04 draws per circuit). **A:** Adult surveys. **B:** Container (PrPC) and Parity (PrNF) Surveys.

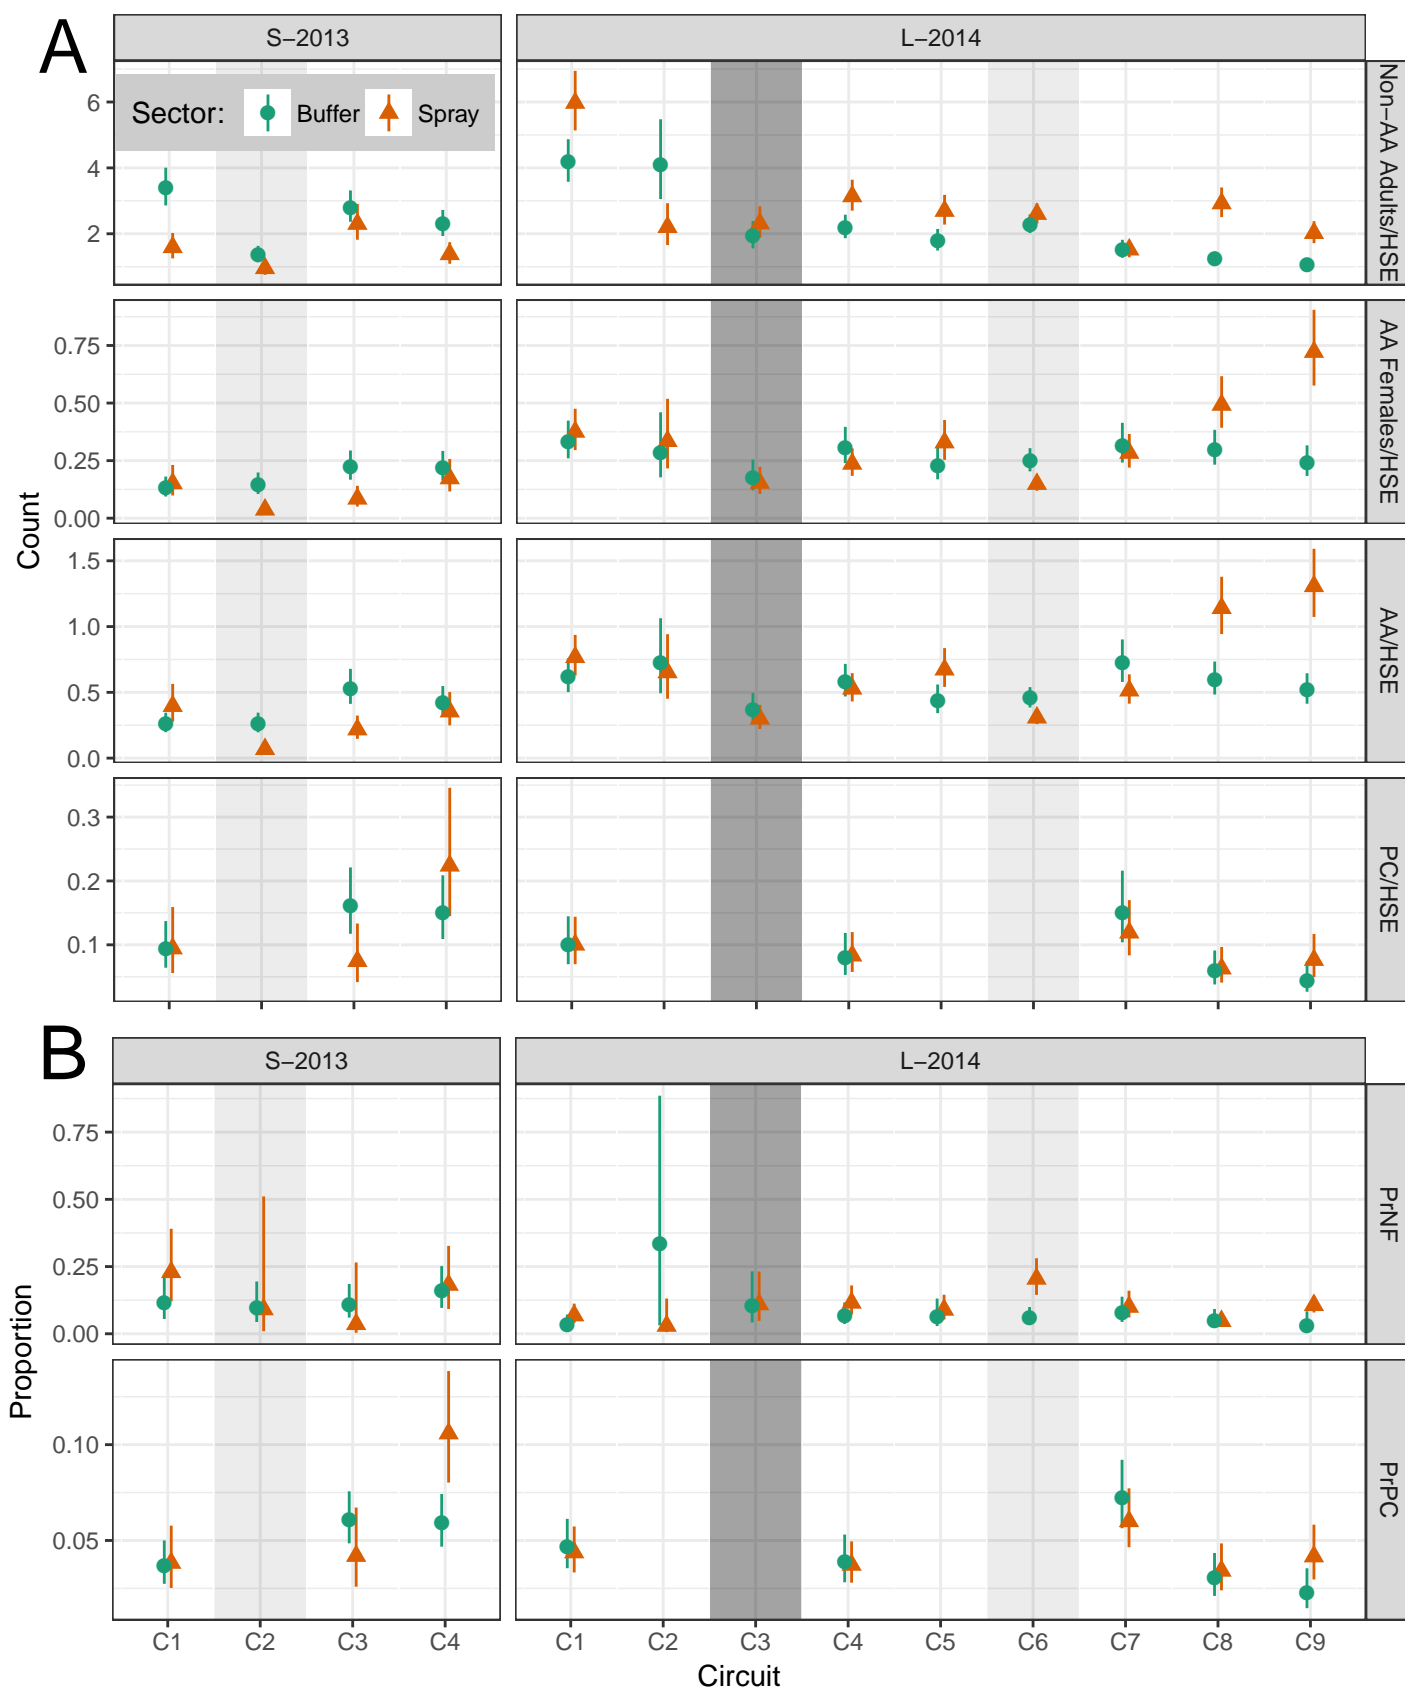

| Experiment | Circuit | Weeks | Treatment      | Houses | Surveys | Full Surveys | Buffer | Spray |
|------------|---------|-------|----------------|--------|---------|--------------|--------|-------|
| S-2013     | C1      | 01-04 |                | 943    | 944     | 863          | 613    | 331   |
| S-2013     | C2      | 03-07 |                | 433    | 603     | 0            | 603    | 0     |
| S-2013     | C2      | 03-07 | Exper. spray   | 246    | 380     | 0            | 0      | 380   |
| S-2013     | C3      | 09-12 |                | 935    | 949     | 885          | 618    | 331   |
| S-2013     | C4      | 13-16 |                | 930    | 967     | 882          | 614    | 353   |
| L-2014     | C1      | 01-04 |                | 1470   | 1473    | 1289         | 729    | 744   |
| L-2014     | C2      | 04-05 |                | 430    | 430     | 0            | 203    | 227   |
| L-2014     | C3      | 05-06 | Citywide spray | 792    | 848     | 0            | 411    | 437   |
| L-2014     | C4      | 07-12 |                | 1452   | 1500    | 1359         | 704    | 796   |
| L-2014     | C5      | 15-16 |                | 1206   | 1212    | 0            | 567    | 645   |
| L-2014     | C6      | 17-21 |                | 777    | 1202    | 0            | 1202   | 0     |
| L-2014     | C6      | 17-21 | Exper. spray   | 869    | 1300    | 0            | 0      | 1300  |
| L-2014     | C7      | 22-27 |                | 1287   | 1319    | 1147         | 610    | 709   |
| L-2014     | C8      | 29-33 |                | 1461   | 1482    | 1267         | 720    | 762   |
| L-2014     | C9      | 41-44 |                | 1339   | 1358    | 1125         | 664    | 694   |

**Table S1. [tab\_count\_circuit2]. Observation counts by Circuit.** *Weeks*: Week number from experiment start. *Houses*: number of unique houses surveyed. *Surveys*: total surveys (either adult, or combined adult and immature). *Full Surveys*: surveys where both adult and immatures were surveyed. *Buffer, Spray*: surveys in buffer and spray sector, respectively.

| Experiment | Circuit | Weeks | Treatment      | Ratio | SE   | p.value         |
|------------|---------|-------|----------------|-------|------|-----------------|
| S-2013     | C1      | 01-04 |                | 1.52  | 0.31 | <b>0.0395</b>   |
| S-2013     | C2      | 03-07 | Exper. spray   | 0.26  | 0.07 | <b>4.16e-07</b> |
| S-2013     | C3      | 09-12 |                | 0.41  | 0.09 | <b>2.19e-05</b> |
| S-2013     | C4      | 13-16 |                | 0.84  | 0.16 | 0.357           |
| L-2014     | C1      | 01-04 |                | 1.24  | 0.16 | 0.09            |
| L-2014     | C2      | 04-05 |                | 0.90  | 0.21 | 0.659           |
| L-2014     | C3      | 05-06 | Citywide spray | 0.82  | 0.15 | 0.284           |
| L-2014     | C4      | 07-12 |                | 0.91  | 0.12 | 0.474           |
| L-2014     | C5      | 15-16 |                | 1.54  | 0.23 | <b>0.0034</b>   |
| L-2014     | C6      | 17-21 | Exper. spray   | 0.67  | 0.07 | <b>0.00028</b>  |
| L-2014     | C7      | 22-27 |                | 0.71  | 0.10 | <b>0.0132</b>   |
| L-2014     | C8      | 29-33 |                | 1.91  | 0.24 | <b>2.72e-07</b> |
| L-2014     | C9      | 41-44 |                | 2.53  | 0.34 | <b>2.67e-12</b> |

**Table S2. [tab\_contr\_tx]. Comparison between sectors (within time):** Ratio of AA/HSE in spray sector relative to buffer sector (spray/buffer). **Bold p.values**: significant difference between sectors. In both years, the spray sector starts with more adults per house, and spraying reduces AA/HSE relative to buffer sectors. As in Table S3, the effects of spraying are most pronounced in 2013. See also Fig. 4A.

| Experiment | Circuit | Weeks | Treatment      | Ratio | SE   | p.value         |
|------------|---------|-------|----------------|-------|------|-----------------|
| S-2013     | C2      | 03-07 | Exper. spray   | 0.17  | 0.05 | <b>1.24e-09</b> |
| S-2013     | C3      | 09-12 |                | 0.55  | 0.13 | <b>0.0351</b>   |
| S-2013     | C4      | 13-16 |                | 0.89  | 0.20 | 0.944           |
| L-2014     | C2      | 04-05 | Citywide spray | 0.85  | 0.16 | 0.979           |
| L-2014     | C3      | 05-06 |                | 0.39  | 0.06 | <b>4.87e-08</b> |
| L-2014     | C4      | 07-12 |                | 0.69  | 0.09 | <b>0.0251</b>   |
| L-2014     | C5      | 15-16 | Exper. spray   | 0.88  | 0.12 | 0.954           |
| L-2014     | C6      | 17-21 |                | 0.40  | 0.05 | <b>8.97e-14</b> |
| L-2014     | C7      | 22-27 |                | 0.67  | 0.09 | <b>0.0173</b>   |
| L-2014     | C8      | 29-33 |                | 1.49  | 0.18 | <b>0.0103</b>   |
| L-2014     | C9      | 41-44 |                | 1.70  | 0.21 | <b>0.000172</b> |

**Table S3.** [tab\_contr\_time]. **Comparison between times (within spray sector):** Ratio of AA/HSE relative to baseline (C1, spray sector only). **Bold p.values:** significant difference from baseline circuit. In both years, spraying reduces AA/HSE relative to baseline (C1). The effects of spraying are most pronounced in 2013, but are short-lived in both years. See also Fig. 4A.

| Experiment | Contrast                     | Ratio | SE   | p.value       |
|------------|------------------------------|-------|------|---------------|
| S-2013     | No Prior Spray / Prior Spray | 1.69  | 1.20 | 0.711         |
| L-2014     | No Prior Spray / Prior Spray | 2.01  | 0.62 | <b>0.0467</b> |
| L-2014     | Timing Unclear / Prior Spray | 0.71  | 0.26 | 0.568         |

**Table S4.** [tab\_contr\_spray]. **Comparison between spray status (whether house was sprayed in prior week):** Ratio of AA/HSE in houses that were or were not sprayed in the week prior to surveying (no prior spray / prior spray). **Bold p.values:** In L-2014, houses without prior spraying yielded significantly more adults than houses with prior spraying. In S-2013, most houses were sprayed in the prior week. In L-2014, the exact date of spraying was uncertain for a small number of houses. See also Table S5.

| Experiment | Spray.status   | nObs | Group     | Est  | SE   | 95% CI    |
|------------|----------------|------|-----------|------|------|-----------|
| S-2013     | Prior Spray    | 315  | <b>b</b>  | 0.06 | 0.02 | 0.03-0.14 |
| S-2013     | No Prior Spray | 56   | <b>ab</b> | 0.11 | 0.07 | 0.02-0.58 |
| L-2014     | Prior Spray    | 890  | <b>a</b>  | 0.28 | 0.04 | 0.19-0.40 |
| L-2014     | No Prior Spray | 205  | <b>a</b>  | 0.56 | 0.15 | 0.27-1.15 |
| L-2014     | Timing Unclear | 164  | <b>ab</b> | 0.20 | 0.07 | 0.08-0.48 |

**Table S5.** [tab\_hsd\_spray]. **Effect of spray in previous week on AA/HSE.** A single model (NB-GLM) includes both experiment year and spray status as predictors. Only house surveys in the spray sector during experimental spraying are included (i.e., S-2013 Circuit 2 and L-2014 Circuit 6). See also Table S4.



| Circuit | Weeks | Treatment    | Sector | nObs | Group | Est  | SE   | 95% CI    |
|---------|-------|--------------|--------|------|-------|------|------|-----------|
| C1      | 01-04 |              | Buffer | 613  | ab    | 0.26 | 0.03 | 0.19-0.37 |
| C2      | 03-07 |              | Buffer | 603  | ab    | 0.26 | 0.03 | 0.18-0.37 |
| C3      | 09-12 |              | Buffer | 618  | c     | 0.53 | 0.06 | 0.39-0.72 |
| C4      | 13-16 |              | Buffer | 614  | a c   | 0.42 | 0.05 | 0.31-0.58 |
| C1      | 01-04 | Exper. spray | Spray  | 331  | abc   | 0.40 | 0.06 | 0.26-0.61 |
| C2      | 03-07 |              | Spray  | 380  | d     | 0.07 | 0.02 | 0.04-0.13 |
| C3      | 09-12 |              | Spray  | 331  | b     | 0.22 | 0.04 | 0.13-0.35 |
| C4      | 13-16 |              | Spray  | 353  | abc   | 0.35 | 0.06 | 0.23-0.54 |

**Table S6A.** [tab\_hsd\_aedes\_2013]. *Ae. aegypti* adults per house (AA/HSE), 2013. Model estimates by circuit and treatment sector. Horizontal line separates treatment sectors; significance groups (Tukey HSD) compare among all rows. See Fig. 4A for model description.

| Circuit | Weeks | Treatment      | Sector | nObs | Group  | Est  | SE   | 95% CI    |
|---------|-------|----------------|--------|------|--------|------|------|-----------|
| C1      | 01-04 |                | Buffer | 729  | abcd   | 0.62 | 0.06 | 0.47-0.81 |
| C2      | 04-05 |                | Buffer | 203  | abcdef | 0.72 | 0.12 | 0.43-1.21 |
| C3      | 05-06 | Citywide spray | Buffer | 411  | a gh   | 0.37 | 0.05 | 0.25-0.55 |
| C4      | 07-12 |                | Buffer | 704  | abcd   | 0.58 | 0.05 | 0.44-0.77 |
| C5      | 15-16 |                | Buffer | 567  | abc gh | 0.44 | 0.05 | 0.31-0.61 |
| C6      | 17-21 |                | Buffer | 1202 | a c g  | 0.46 | 0.03 | 0.36-0.57 |
| C7      | 22-27 |                | Buffer | 610  | b d    | 0.72 | 0.07 | 0.54-0.97 |
| C8      | 29-33 |                | Buffer | 720  | abcd   | 0.60 | 0.06 | 0.45-0.79 |
| C9      | 41-44 |                | Buffer | 664  | abcd g | 0.52 | 0.05 | 0.38-0.69 |
| C1      | 01-04 |                | Spray  | 744  | de     | 0.77 | 0.07 | 0.59-1.00 |
| C2      | 04-05 |                | Spray  | 227  | abcde  | 0.65 | 0.11 | 0.40-1.07 |
| C3      | 05-06 | Citywide spray | Spray  | 437  | gh     | 0.30 | 0.04 | 0.20-0.45 |
| C4      | 07-12 |                | Spray  | 796  | abcd g | 0.53 | 0.05 | 0.40-0.69 |
| C5      | 15-16 |                | Spray  | 645  | bcd    | 0.67 | 0.07 | 0.50-0.90 |
| C6      | 17-21 | Exper. spray   | Spray  | 1300 | h      | 0.31 | 0.02 | 0.24-0.39 |
| C7      | 22-27 |                | Spray  | 709  | abcd g | 0.51 | 0.05 | 0.39-0.68 |
| C8      | 29-33 |                | Spray  | 762  | ef     | 1.14 | 0.10 | 0.89-1.47 |
| C9      | 41-44 |                | Spray  | 694  | f      | 1.31 | 0.12 | 1.01-1.70 |

**Table S6B.** [tab\_hsd\_aedes\_2014]. *Ae. aegypti* adults per house (AA/HSE), 2014. See Table S6A for details.

| Circuit | Weeks | Treatment    | Sector | nObs | Group | Est  | SE   | 95% CI    |
|---------|-------|--------------|--------|------|-------|------|------|-----------|
| C1      | 01-04 |              | Buffer | 613  | ab    | 0.15 | 0.01 | 0.11-0.19 |
| C2      | 03-07 |              | Buffer | 603  | ab    | 0.15 | 0.01 | 0.11-0.19 |
| C3      | 09-12 |              | Buffer | 618  | a c   | 0.21 | 0.02 | 0.17-0.26 |
| C4      | 13-16 |              | Buffer | 614  | c     | 0.23 | 0.02 | 0.19-0.28 |
| C1      | 01-04 |              | Spray  | 331  | abc   | 0.16 | 0.02 | 0.11-0.22 |
| C2      | 03-07 | Exper. spray | Spray  | 380  | d     | 0.06 | 0.01 | 0.03-0.10 |
| C3      | 09-12 |              | Spray  | 331  | b     | 0.13 | 0.02 | 0.08-0.19 |
| C4      | 13-16 |              | Spray  | 353  | abc   | 0.17 | 0.02 | 0.12-0.23 |

**Table S7A. [tab\_hsd\_infest\_2013]. Proportion *Ae. aegypti* adult-infested houses (PrIH), 2013.** Model estimates by circuit and treatment sector. Horizontal line separates treatment sectors; significance groups (Tukey HSD) compare among all rows. See Fig. 4B for model description.

| Circuit | Weeks | Treatment      | Sector | nObs | Group  | Est  | SE   | 95% CI    |
|---------|-------|----------------|--------|------|--------|------|------|-----------|
| C1      | 01-04 |                | Buffer | 729  | ab     | 0.31 | 0.02 | 0.26-0.36 |
| C2      | 04-05 |                | Buffer | 203  | abcd   | 0.33 | 0.03 | 0.24-0.43 |
| C3      | 05-06 | Citywide spray | Buffer | 411  | ef     | 0.16 | 0.02 | 0.11-0.22 |
| C4      | 07-12 |                | Buffer | 704  | abc g  | 0.26 | 0.02 | 0.22-0.32 |
| C5      | 15-16 |                | Buffer | 567  | c e g  | 0.22 | 0.02 | 0.17-0.28 |
| C6      | 17-21 |                | Buffer | 1202 | c e g  | 0.21 | 0.01 | 0.18-0.25 |
| C7      | 22-27 |                | Buffer | 610  | abc g  | 0.27 | 0.02 | 0.22-0.33 |
| C8      | 29-33 |                | Buffer | 720  | c e g  | 0.22 | 0.02 | 0.18-0.27 |
| C9      | 41-44 |                | Buffer | 664  | abc g  | 0.26 | 0.02 | 0.21-0.32 |
| C1      | 01-04 |                | Spray  | 744  | a d    | 0.34 | 0.02 | 0.29-0.39 |
| C2      | 04-05 |                | Spray  | 227  | abcd g | 0.29 | 0.03 | 0.21-0.39 |
| C3      | 05-06 | Citywide spray | Spray  | 437  | e g    | 0.18 | 0.02 | 0.13-0.24 |
| C4      | 07-12 |                | Spray  | 796  | bc e g | 0.23 | 0.01 | 0.19-0.28 |
| C5      | 15-16 |                | Spray  | 645  | abc    | 0.28 | 0.02 | 0.23-0.33 |
| C6      | 17-21 | Exper. spray   | Spray  | 1300 | f      | 0.11 | 0.01 | 0.09-0.14 |
| C7      | 22-27 |                | Spray  | 709  | c e g  | 0.22 | 0.02 | 0.18-0.27 |
| C8      | 29-33 |                | Spray  | 762  | a d    | 0.34 | 0.02 | 0.29-0.40 |
| C9      | 41-44 |                | Spray  | 694  | d      | 0.41 | 0.02 | 0.36-0.47 |

**Table S7B. [tab\_hsd\_infest\_2014]. Proportion *Ae. aegypti* adult-infested houses (PrIH), 2014.** See Table S7A for details.

| Circuit | Weeks | Treatment    | Sector | nObs | Group | Est  | SE   | 95% CI    |
|---------|-------|--------------|--------|------|-------|------|------|-----------|
| C1      | 01-04 |              | Buffer | 58   | a     | 0.11 | 0.04 | 0.05-0.25 |
| C2      | 03-07 |              | Buffer | 52   | a     | 0.10 | 0.03 | 0.04-0.22 |
| C3      | 09-12 |              | Buffer | 73   | a     | 0.11 | 0.03 | 0.05-0.21 |
| C4      | 13-16 |              | Buffer | 92   | a     | 0.16 | 0.03 | 0.09-0.28 |
| C1      | 01-04 |              | Spray  | 32   | a     | 0.23 | 0.06 | 0.10-0.43 |
| C2      | 03-07 | Exper. spray | Spray  | 9    | a     | 0.09 | 0.09 | 0.01-0.64 |
| C3      | 09-12 |              | Spray  | 23   | a     | 0.04 | 0.04 | 0.00-0.37 |
| C4      | 13-16 |              | Spray  | 34   | a     | 0.18 | 0.05 | 0.08-0.37 |

**Table S8A. [tab\_hsd\_par\_2013]. Proportion nulliparouous *Ae. aegypti* females (PrNF), 2013.** Model estimates by circuit and treatment sector. Horizontal line separates treatment sectors; significance groups (Tukey HSD) compare among all rows. See also Fig. S5.

| Circuit | Weeks | Treatment      | Sector | nObs | Group | Est  | SE   | 95% CI    |
|---------|-------|----------------|--------|------|-------|------|------|-----------|
| C1      | 01-04 |                | Buffer | 144  | a     | 0.03 | 0.01 | 0.01-0.09 |
| C2      | 04-05 |                | Buffer | 3    | ab    | 0.33 | 0.27 | 0.01-0.95 |
| C3      | 05-06 | Citywide spray | Buffer | 39   | ab    | 0.10 | 0.04 | 0.03-0.29 |
| C4      | 07-12 |                | Buffer | 120  | a     | 0.07 | 0.02 | 0.03-0.14 |
| C5      | 15-16 |                | Buffer | 76   | ab    | 0.06 | 0.02 | 0.02-0.17 |
| C6      | 17-21 |                | Buffer | 155  | a     | 0.06 | 0.01 | 0.03-0.12 |
| C7      | 22-27 |                | Buffer | 93   | ab    | 0.08 | 0.02 | 0.04-0.16 |
| C8      | 29-33 |                | Buffer | 95   | a     | 0.05 | 0.01 | 0.02-0.11 |
| C9      | 41-44 |                | Buffer | 93   | a     | 0.03 | 0.01 | 0.01-0.12 |
| C1      | 01-04 |                | Spray  | 155  | a     | 0.07 | 0.02 | 0.03-0.13 |
| C2      | 04-05 |                | Spray  | 39   | ab    | 0.03 | 0.02 | 0.00-0.21 |
| C3      | 05-06 | Citywide spray | Spray  | 47   | ab    | 0.11 | 0.04 | 0.04-0.29 |
| C4      | 07-12 |                | Spray  | 106  | ab    | 0.12 | 0.02 | 0.06-0.21 |
| C5      | 15-16 |                | Spray  | 101  | ab    | 0.09 | 0.02 | 0.04-0.17 |
| C6      | 17-21 | Exper. spray   | Spray  | 95   | b     | 0.20 | 0.03 | 0.13-0.31 |
| C7      | 22-27 |                | Spray  | 96   | ab    | 0.10 | 0.02 | 0.05-0.19 |
| C8      | 29-33 |                | Spray  | 161  | a     | 0.05 | 0.01 | 0.02-0.09 |
| C9      | 41-44 |                | Spray  | 197  | ab    | 0.11 | 0.01 | 0.07-0.16 |

**Table S8B. [tab\_hsd\_par\_2014]. Proportion nulliparouous *Ae. aegypti* females (PrNF), 2014.** See Table S8A for details.

| Circuit | Weeks | Sector | nObs | Group | Est  | SE   | 95% CI      |
|---------|-------|--------|------|-------|------|------|-------------|
| C1      | 01-04 | Buffer | 565  | a     | 0.09 | 0.02 | 0.060-0.147 |
| C3      | 09-12 | Buffer | 590  | ab    | 0.16 | 0.02 | 0.111-0.234 |
| C4      | 13-16 | Buffer | 583  | ab    | 0.15 | 0.02 | 0.103-0.221 |
| C1      | 01-04 | Spray  | 297  | ab    | 0.09 | 0.02 | 0.051-0.175 |
| C3      | 09-12 | Spray  | 282  | a     | 0.07 | 0.02 | 0.038-0.148 |
| C4      | 13-16 | Spray  | 268  | b     | 0.22 | 0.04 | 0.134-0.373 |

**Table S9A.** [tab\_hsd\_bi\_2013]. *Ae. aegypti* Positive Containers per House (PC/HSE), 2013.

Note that Breteau index (BI) = 100× estimate. Model estimates by circuit and treatment sector. Horizontal line separates treatment sectors; significance groups (Tukey HSD) compare among all rows. No container surveys were conducted during spraying. See also Fig. S5.

| Circuit | Weeks | Sector | nObs | Group | Est  | SE   | 95% CI      |
|---------|-------|--------|------|-------|------|------|-------------|
| C1      | 01-04 | Buffer | 638  | abc   | 0.10 | 0.02 | 0.063-0.159 |
| C4      | 07-12 | Buffer | 606  | abc   | 0.08 | 0.01 | 0.048-0.131 |
| C7      | 22-27 | Buffer | 514  | a     | 0.15 | 0.02 | 0.095-0.237 |
| C8      | 29-33 | Buffer | 629  | bc    | 0.06 | 0.01 | 0.034-0.102 |
| C9      | 41-44 | Buffer | 564  | b     | 0.04 | 0.01 | 0.023-0.084 |
| C1      | 01-04 | Spray  | 649  | abc   | 0.10 | 0.02 | 0.064-0.158 |
| C4      | 07-12 | Spray  | 710  | abc   | 0.08 | 0.01 | 0.052-0.132 |
| C7      | 22-27 | Spray  | 613  | a c   | 0.12 | 0.02 | 0.076-0.186 |
| C8      | 29-33 | Spray  | 621  | bc    | 0.06 | 0.01 | 0.037-0.108 |
| C9      | 41-44 | Spray  | 551  | abc   | 0.08 | 0.01 | 0.045-0.130 |

**Table S9B.** [tab\_hsd\_bi\_2014]. *Ae. aegypti* Positive Containers per House (PC/HSE), 2014.

Note that Breteau index (BI) = 100× estimate. See Table S9A for details.

| Circuit | Weeks | Sector | nObs | Group | Est  | SE   | 95% CI      |
|---------|-------|--------|------|-------|------|------|-------------|
| C1      | 01-04 | Buffer | 565  | a     | 0.04 | 0.00 | 0.026-0.053 |
| C3      | 09-12 | Buffer | 590  | b     | 0.06 | 0.01 | 0.047-0.079 |
| C4      | 13-16 | Buffer | 583  | ab    | 0.06 | 0.01 | 0.045-0.077 |
| C1      | 01-04 | Spray  | 297  | ab    | 0.04 | 0.01 | 0.023-0.062 |
| C3      | 09-12 | Spray  | 282  | ab    | 0.04 | 0.01 | 0.024-0.073 |
| C4      | 13-16 | Spray  | 268  | c     | 0.11 | 0.01 | 0.076-0.145 |

**Table S10A. [tab\_hsd\_cont\_2013]. Proportion *Ae. aegypti* Positive Containers (PrPC), 2013.** Model estimates by circuit and treatment sector. Horizontal line separates treatment sectors; significance groups (Tukey HSD) compare among all rows. No container surveys were conducted during spraying. See also Fig. S5.

| Circuit | Weeks | Sector | nObs | Group | Est  | SE   | 95% CI      |
|---------|-------|--------|------|-------|------|------|-------------|
| C1      | 01-04 | Buffer | 638  | abc   | 0.05 | 0.01 | 0.033-0.066 |
| C4      | 07-12 | Buffer | 606  | ab    | 0.04 | 0.01 | 0.026-0.057 |
| C7      | 22-27 | Buffer | 514  | c     | 0.07 | 0.01 | 0.053-0.098 |
| C8      | 29-33 | Buffer | 629  | a     | 0.03 | 0.00 | 0.019-0.048 |
| C9      | 41-44 | Buffer | 564  | a     | 0.02 | 0.00 | 0.013-0.040 |
| C1      | 01-04 | Spray  | 649  | abc   | 0.04 | 0.01 | 0.031-0.061 |
| C4      | 07-12 | Spray  | 710  | ab    | 0.04 | 0.00 | 0.026-0.053 |
| C7      | 22-27 | Spray  | 613  | bc    | 0.06 | 0.01 | 0.044-0.082 |
| C8      | 29-33 | Spray  | 621  | ab    | 0.03 | 0.01 | 0.022-0.053 |
| C9      | 41-44 | Spray  | 551  | abc   | 0.04 | 0.01 | 0.027-0.063 |

**Table S10B. [tab\_hsd\_cont\_2014]. Proportion *Ae. aegypti* Positive Containers (PrPC), 2014.** See Table S10A for details.

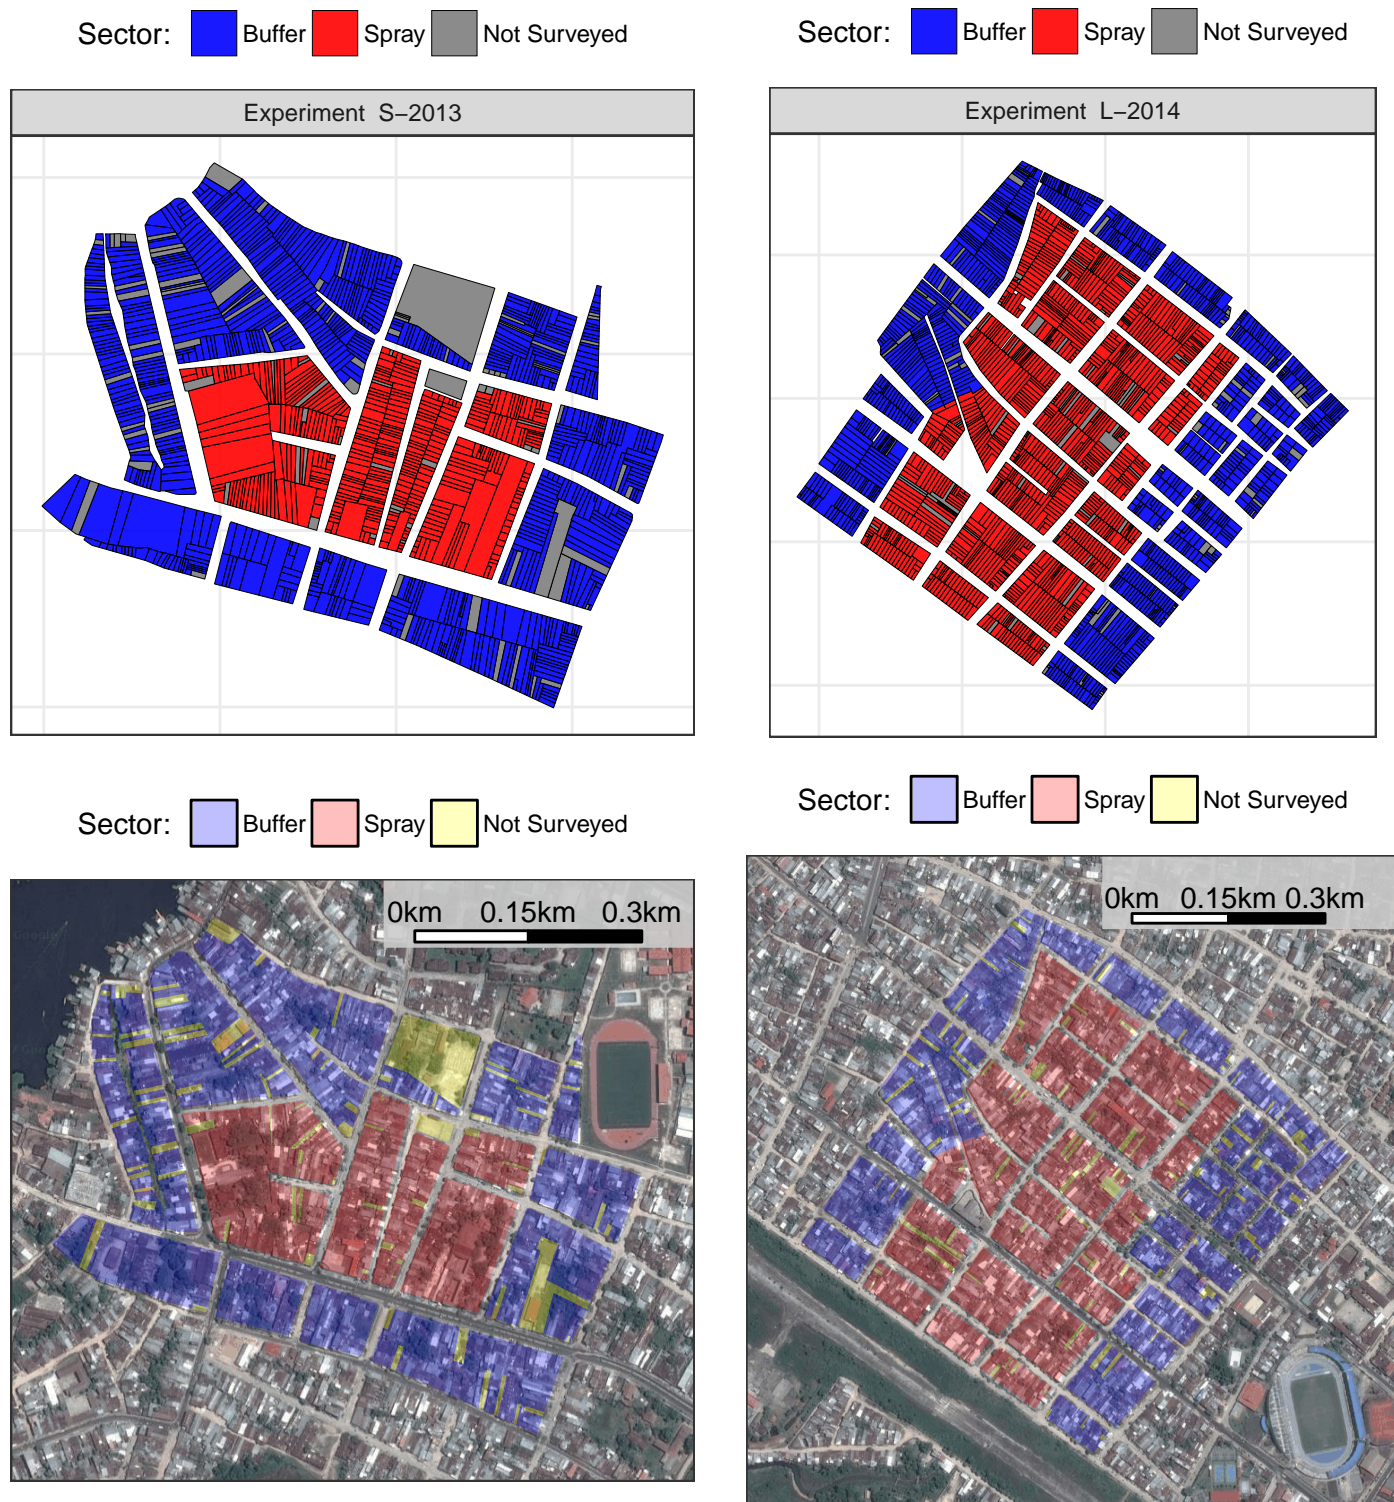

**Figure S6.** [map\_base]. Maps of experimental areas, showing satellite imagery. Note the scale differs between experiments. See also Fig. 1.

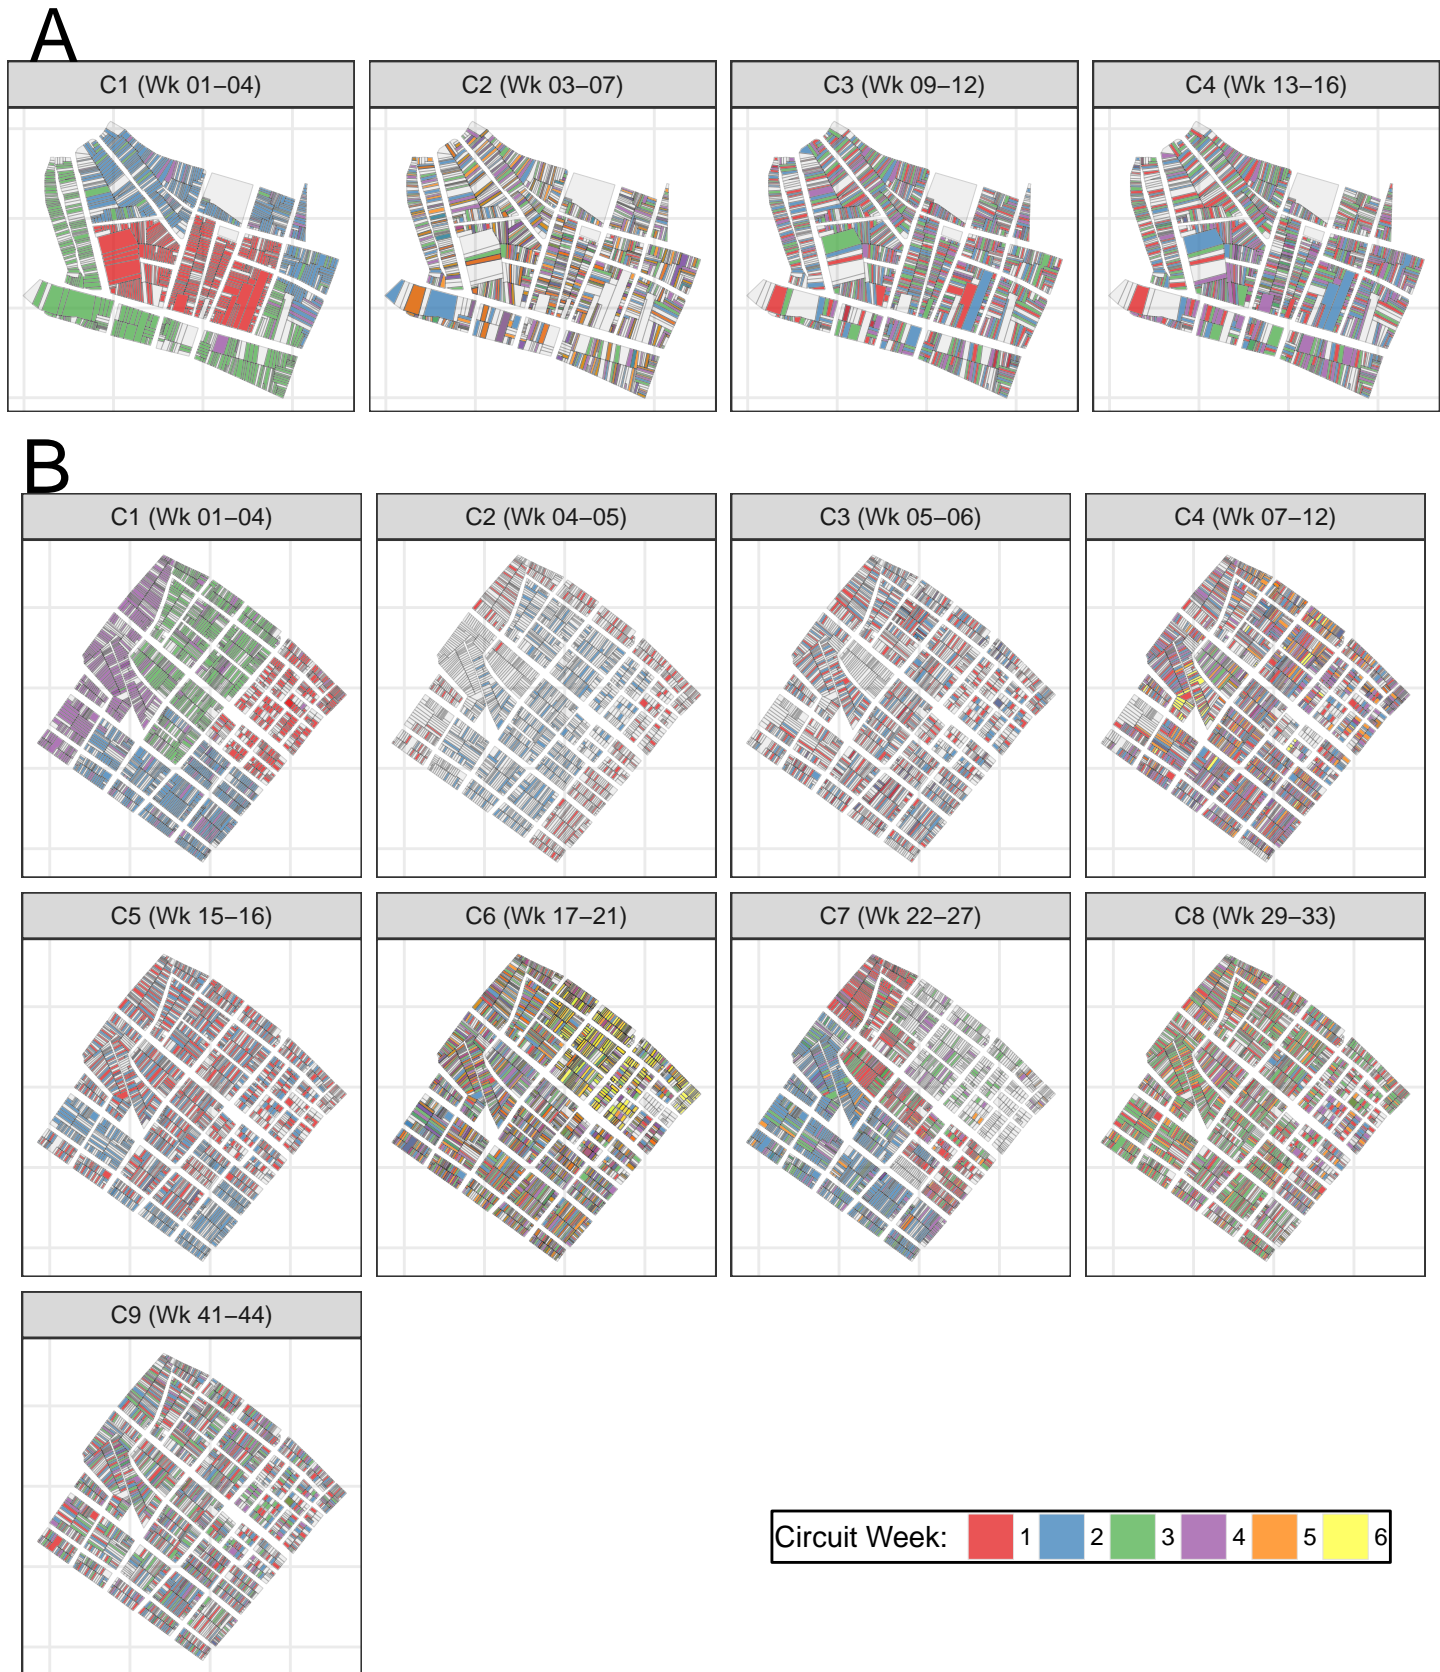

**Figure S7.** [map\_week]. Map showing survey locations by circuit (panel) and week within circuit).  
**A:** S-2013. **B:** L-2014.

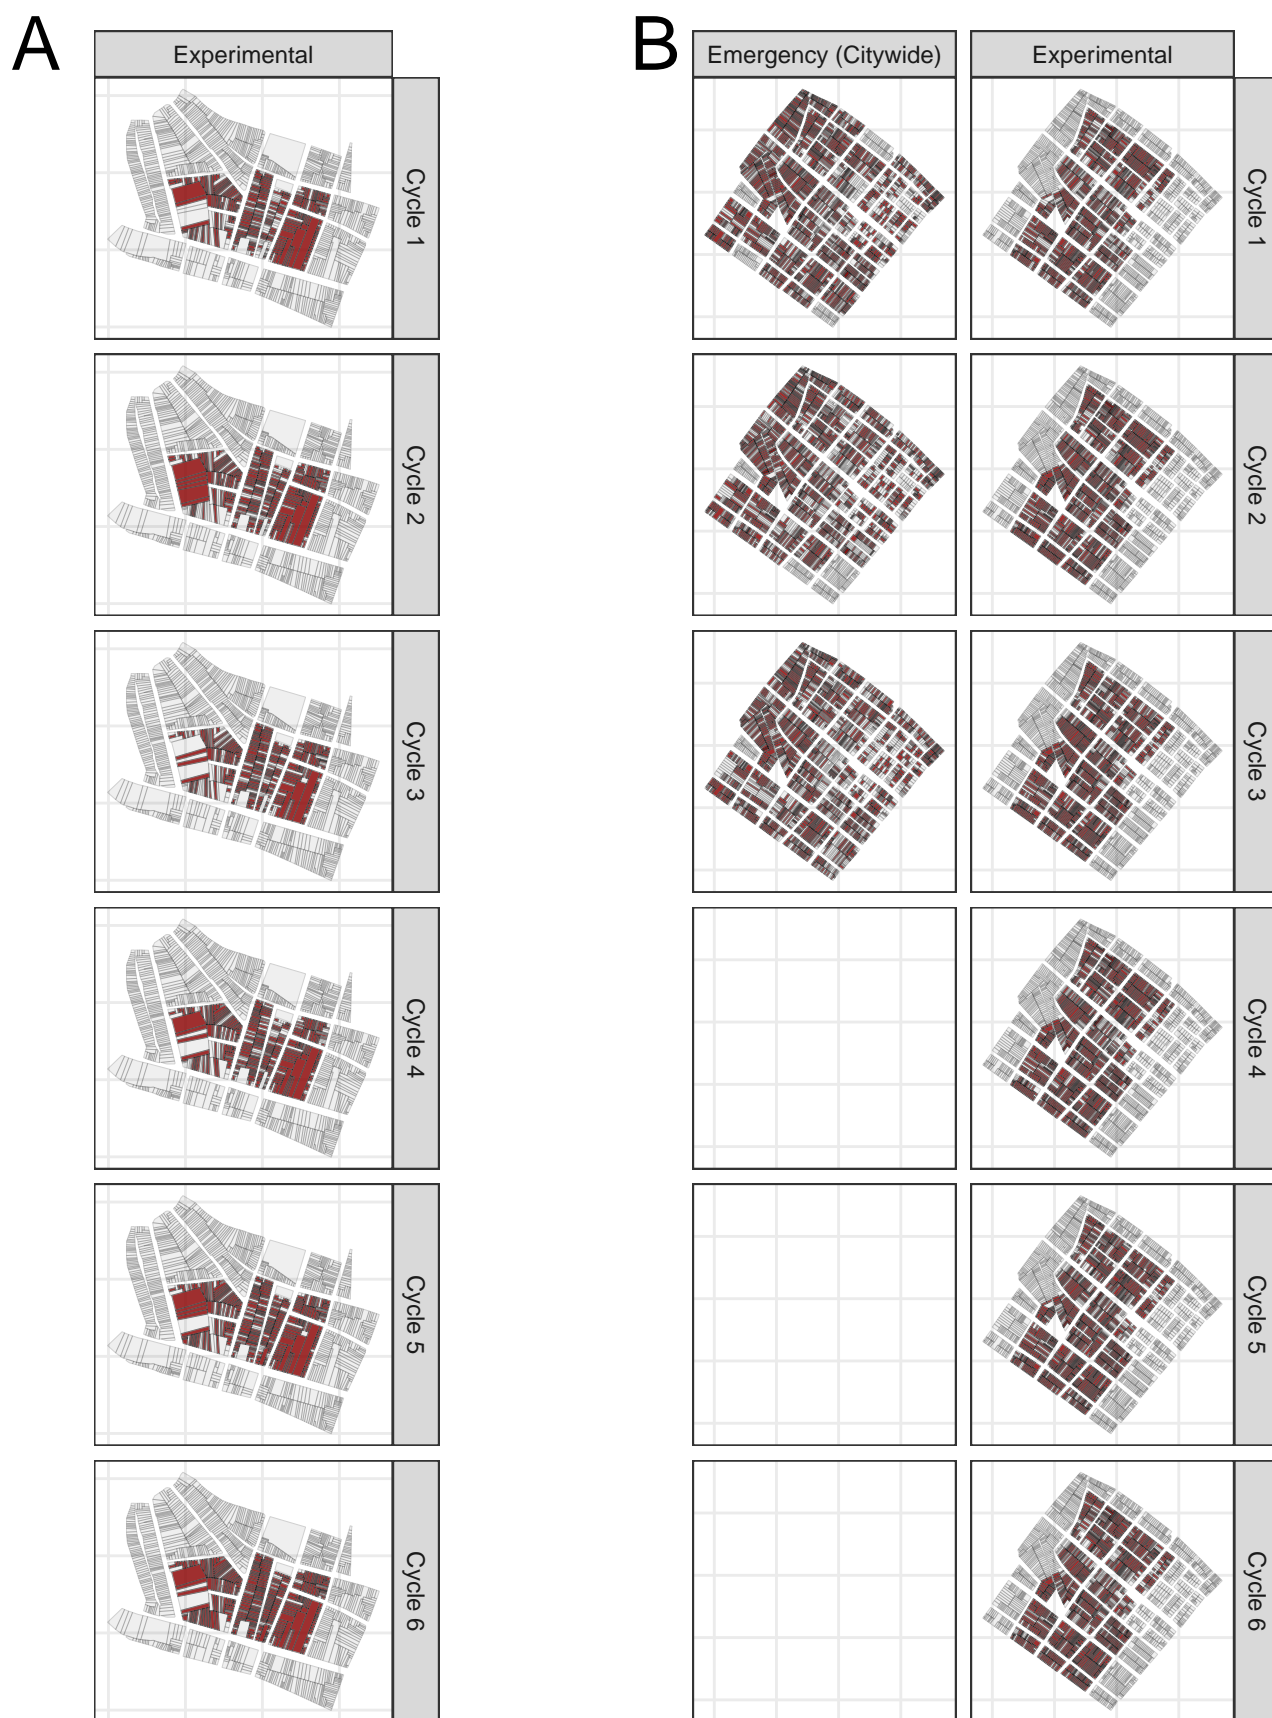

**Figure S8.** [map\_spray]. Maps of spray events (red) by spray cycle (rows). **A:** S-2013. **B:** During L-2014, 3 cycles of emergency citywide spraying were conducted, in addition to experimental spraying. Note the map scale differs between **A** and **B**. See also Fig. 1. S15
